## RESEARCH ARTICLE

# Poly-(ADP-ribose) polymerases inhibition by olaparib attenuates activities of the NLRP3 inflammasome and of NF- $\kappa$ B in THP-1 monocytes

Khamis Mustafa<sup>1‡</sup>, Ying Han<sup>2‡</sup>, Dan He<sup>1</sup>, Ying Wang<sup>1</sup>, Nan Niu<sup>3</sup>, Pedro A. Jose<sup>4,5</sup>, Yinong Jiang<sup>6</sup>, Jeffrey B. Kopp<sup>7</sup>, Hewang Lee<sup>1,4,7‡\*</sup>, Peng Qu<sup>1,3,8‡\*</sup>

**1** Institute of Heart and Vessel Diseases, The Second Affiliated Hospital, Dalian Medical University, Dalian, China, **2** Department of Cardiology, Jinqui Hospital of Liaoning Province, Shenyang, China, **3** Department of Cardiology, The Second Affiliated Hospital, Dalian Medical University, Dalian, China, **4** Department of Medicine, The George Washington University School of Medicine & Health Sciences, Washington, District of Columbia, United States of America, **5** Department of Physiology/Pharmacology, The George Washington University School of Medicine & Health Sciences, Washington, District of Columbia, United States of America, **6** Department of Cardiology, The First Affiliated Hospital, Dalian Medical University, Dalian, China, **7** Kidney Disease Section, Kidney Diseases Branch, National Institute of Diabetes and Digestive and Kidney Diseases, National Institutes of Health, Bethesda, Maryland, United States of America, **8** Faculty of Medicine, Dalian University of Technology, Dalian, China

‡ KM and YH are co-first authors. HL and PQ are joint senior authors to this work.

\* [lih@gwu.edu](mailto:lih@gwu.edu) (HL); [qupeng777@aliyun.com](mailto:qupeng777@aliyun.com) (PQ)

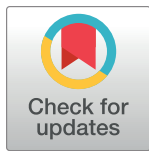

## OPEN ACCESS

**Citation:** Mustafa K, Han Y, He D, Wang Y, Niu N, Jose PA, et al. (2024) Poly-(ADP-ribose) polymerases inhibition by olaparib attenuates activities of the NLRP3 inflammasome and of NF- $\kappa$ B in THP-1 monocytes. PLoS ONE 19(2): e0295837. <https://doi.org/10.1371/journal.pone.0295837>

**Editor:** Xiangning Zhang, Guangdong Medical University, CHINA

**Received:** March 5, 2023

**Accepted:** December 1, 2023

**Published:** February 9, 2024

**Copyright:** This is an open access article, free of all copyright, and may be freely reproduced, distributed, transmitted, modified, built upon, or otherwise used by anyone for any lawful purpose. The work is made available under the [Creative Commons CC0](https://creativecommons.org/licenses/by/4.0/) public domain dedication.

**Data Availability Statement:** All relevant data are within the paper and its [Supporting Information](#) files.

**Funding:** The study was supported by the following grants: National Natural Science Foundation of China (91739119 and 81670406 to P.Q. and 81670698 to H.L.); US Intramural Research Program of the National Institute of Diabetes and Digestive and Kidney Diseases (Z01DK043308 and 1ZIADK043411 to J.B.K.); and US National

## Abstract

Poly-(ADP-ribose) polymerases (PARPs) are a protein family that make ADP-ribose modifications on target genes and proteins. PARP family members contribute to the pathogenesis of chronic inflammatory diseases, including atherosclerosis, in which monocytes/macrophages play important roles. PARP inhibition is protective against atherosclerosis. However, the mechanisms by which PARP inhibition exerts this beneficial effect are not well understood. Here we show that in THP-1 monocytes, inhibition of PARP by olaparib attenuated oxidized low-density lipoprotein (oxLDL)-induced protein expressions of nucleotide-binding oligomerization domain, leucine-rich repeat and pyrin domain-containing-3 (NLRP3) inflammasome components: NLRP3, apoptosis-associated speck-like protein containing a caspase activation and recruitment domain (ASC), and caspase-1. Consistent with this effect, olaparib decreased oxLDL-enhanced interleukin (IL)-1 $\beta$  and IL-18 protein expression. Olaparib also decreased the oxLDL-mediated increase in mitochondrial reactive oxygen species. Similar to the effects of the NLRP3 inhibitor, MCC950, olaparib attenuated oxLDL-induced adhesion of monocytes to cultured human umbilical vein endothelial cells and reduced foam cell formation. Furthermore, olaparib attenuated the oxLDL-mediated activation of nuclear factor (NF)- $\kappa$ B through the oxLDL-mediated increase in I $\kappa$ B $\alpha$  phosphorylation and assembly of NF- $\kappa$ B subunits, demonstrated by co-immunoprecipitation of I $\kappa$ B $\alpha$  with RelA/p50 and RelB/p52 subunits. Moreover, PARP inhibition decreased oxLDL-mediated protein expression of a NF- $\kappa$ B target gene, *VCAM1*, encoding vascular cell adhesion molecule-1. This finding indicates an important role for NF- $\kappa$ B activity in PARP-mediated activation of the NLRP3 inflammasome. Thus, PARP inhibition by olaparib attenuates NF- $\kappa$ B and

Institutes of Health (DK119652 and DK134574 to P.A.J.). The funders had no role in study design, data collection and analysis, decision to publish, or preparation of the manuscript.

**Competing interests:** The authors have declared that no competing interests exist.

NLRP3 inflammasome activities, lessening monocyte cell adhesion and macrophage foam cell formation. These inhibitory effects of olaparib on NLRP3 activity potentially protect against atherosclerosis.

## Introduction

Poly ADP-ribosylation, carried out by poly-(ADP-ribose) polymerase (PARP), is a posttranslational modification of proteins involved in a wide variety of cellular activities, including DNA repair, transcriptional regulation, inflammation, tumorigenesis, and cell death [1, 2]. Increased activation of PARP contributes to the pathogenesis of diverse chronic inflammatory diseases, and PARP inhibition shows promise in the treatment of these diseases [3, 4], but its role in atherosclerosis is not well known.

Atherosclerosis is a slowly progressive chronic inflammatory condition [5]. The inflammatory response in atherosclerosis is initiated by damage to the vascular endothelium, followed by monocytes entering the arterial wall; subsequently, other leukocytes are recruited [6]. These cells release diverse vasoactive molecules [6]. Monocytes differentiate into macrophages, which proliferate and ingest oxidized low-density lipoprotein (oxLDL) [7]. These lipids drive monocytes' differentiation into foam cells, which form plaques [7].

The nucleotide-binding oligomerization domain (NOD), leucine-rich repeats (LRR), and pyrin domain-containing 3 (NLRP3) inflammasome is an intracellular multi-protein complex that consists of three components: 1) NLRP3, 2) the adaptor protein ASC [apoptosis-associated speck-like protein containing a caspase activation and recruitment domain (CARD)], and 3) caspase-1 [8]. This inflammasome is an important contributor to the inflammatory response in monocytes/macrophages and to the development of atherosclerosis [8].

In the innate immune system, danger signals, including crystalline cholesterol, oxLDL, reactive oxygen species (ROS), and mitochondrial dysfunction, trigger inflammatory responses [9]. NLRP3 inflammasome activation leads to the maturation of interleukin (IL)-1 $\beta$  and IL-18, which are the key contributors to the inflammatory reaction in the vascular wall and to atherosclerotic plaque formation [10]. The canonical dual-signal model for the activation of NLRP3 inflammasomes proposes that a priming signal induces the upregulation of NLRP3 and pro-IL-1 $\beta$ /pro-IL-18, via activation of the nuclear factor  $\kappa$ -light-chain-enhancer of activated B cells (NF- $\kappa$ B) and a second signal triggers the assembly of the inflammasome complex [11, 12].

NF- $\kappa$ B is a transcription factor protein complex that plays a central role in the inflammatory response [13]. The NF- $\kappa$ B family has five members: NF- $\kappa$ B1 (p105; p50), NF- $\kappa$ B2 (p100; p52), RelA (p65), RelB, and c-Rel [13, 14]. In the inactive state, NF- $\kappa$ B heterodimers (*e.g.*, p50 with RelA, RelB, or c-Rel) are sequestered in the cytoplasm by I $\kappa$ B, an inhibitory protein. Activation of NF- $\kappa$ B is initiated by the phosphorylation of I $\kappa$ B by the I $\kappa$ B kinase (IKK), following which the NF- $\kappa$ B heterodimers dissociate from I $\kappa$ B and translocate to the nucleus [14]. Activated NF- $\kappa$ B induces gene expression of a wide range of proinflammatory molecules, including cytokines, chemokines, and others [15].

In this study, we investigated the role of oxLDL in the activation of PARP in THP-1 cells, a human monocytic leukemia cell line. We further explored the anti-inflammatory effects of olaparib, a small molecule PARP inhibitor [16], on NLRP3 inflammasome activity and subsequent modulation of pathophysiological processes, including the secretion of proinflammatory cytokines, cell adhesion, and foam cell formation. We also investigated the

effects of olaparib on NF- $\kappa$ B activity in the context of oxidative stress-induced inflammatory responses in THP-1 monocytes.

## Materials and methods

### Reagents and antibodies

MCC950, a small molecule NLRP3 inhibitor, and olaparib were purchased from Selleck Chemicals (Houston, TX); oxLDL was purchased from Anhui Yiyuan Bio-technology (Bozhou, China); HyClone RPMI 1640 and DMEM were purchased from Cytiva (Shanghai, China); fetal bovine serum (FBS) and MitoSox Red were purchased from Thermo Fisher Scientific (Beijing, China); aprotinin and leupeptin were purchased from Solarbio Life Science (Beijing, China); DTT (dithiothreitol) was purchased from Wako Pure Chemical Industries (Osaka, Japan); protein A/G-agarose was purchased from Santa Cruz Biotechnology (Shanghai, China); anti-vascular cell adhesion molecule (VCAM)-1, anti-caspase-1, anti-RelA (phosphor-S536), and anti-vinculin antibodies were purchased from Abcam; anti-IL-1 $\beta$  and anti-IL-18 antibodies were purchased from Sab Biotech (Nanjing, China); anti-NLRP3, anti-RelA and anti-phosphor-I $\kappa$  $\alpha$  (ser 32) antibodies, and a NF- $\kappa$  non-canonical pathway antibody sampler kit including anti-IKK $\alpha$ , anti-RelB and anti-p52 antibodies were purchased from Cell Signaling Technology (Shanghai, China); anti-ASC, anti-I $\kappa$  $\alpha$ , and anti-p50 antibodies were purchased from Proteintech Group (Wuhan, China). Other reagents, unless otherwise stated, were purchased from Sigma-Aldrich (Shanghai, China).

### Cell culture

Human monocytic THP-1 cells obtained from the American Type Culture Collection (ATCC, Manassas, VA) and were cultured in RPMI 1640 medium, supplemented with 10% heat-inactivated FBS at 37°C in a 5% CO<sub>2</sub>/95% air humidified incubator, as previously described [17]. Human umbilical vein endothelial cells (HUVECs) (ATCC) were cultured in DMEM medium, supplemented with 10% heat-inactivated FBS.

### PARP-1 activity assay

PARP-1 activity was measured using a fluorometric kit (MilliporeSigma, Cat. No. 17–10149) following the manufacturer's instructions. THP-1 cells were treated with vehicle or oxLDL in the presence or absence of various concentrations of olaparib. Cell lysates were incubated with activated DNA,  $\beta$ -nicotinamide adenine dinucleotide (NAD), and recombinant nicotinamide at 30°C on a plate shaker with gentle agitation for 30 min. The developing reagent was added to each well under dim light and the cells were incubated with light protection for an additional 30 min at room temperature with gentle agitation on a plate shaker. The fluorescence intensity of ammonia from nicotinamide was read on a fluorometer, with excitation at ~420 nm and emission at ~450 nm (Molecular Devices SpectraMax i3x, San Jose, CA).

### Measurement of mitochondrial ROS

Mitochondrial ROS were quantified by MitoSOX Red (2.5  $\mu$ M; Invitrogen), using flow cytometry, as previously described [18]. THP-1 cells ( $2 \times 10^6$  cells) were exposed to 5  $\mu$ M MitoSOX Red and incubated in fresh RPMI 1640 medium, protected from light, at 37°C for 10 min. After washing with pre-warmed RPMI 1640 medium and removing the cell aggregates by filtering through a nylon mesh (40  $\mu$ m), mitochondrial ROS in THP-1 cells were quantified at wavelengths of 510 nm excitation and 580 nm emission by flow cytometry, using a flow-activated cell sorter (FACS) flow cytometry system (Becton Dickinson, San Jose, CA).

### THP-1 cell adhesion assay

HUVECs ( $5 \times 10^3$  cells/well) were seeded in matrix-coated 96-well plates and incubated at  $37^\circ\text{C}$ , 5%  $\text{CO}_2$  for 24 hr at which time HUVECs reached near 100% confluency. THP-1 cell suspensions ( $4 \times 10^5/\text{mL}$ ) were exposed to 2',7'-bis-(2-carboxyethyl)-5-(6)-carboxyfluorescein acetoxymethyl ester (BCECF/AM,  $5 \mu\text{M}$ ) for 1 hr. After washing 3 times with ice-cold 1x PBS, the cell pellets were re-suspended with fresh RPMI 1640. The BCECF-labeled THP-1 cells ( $4 \times 10^4$  in 100  $\mu\text{L}$  suspension) were seeded on to confluent HUVEC monolayers and co-cultured in 96-well plates in a humidified incubator ( $37^\circ\text{C}$ , 5%  $\text{CO}_2$ ) for 1 hr. OxLDL, olaparib, and MCC950 individually or in combination were added in the culture medium. Nonadherent cells were removed by gentle washing, and the number of adherent THP-1 monocytes was counted with a microscope, using ImageJ software (NIH, Bethesda, MD).

The average value of adhesive THP-1 cells in the vehicle treatment group from four ( $n = 4$ ) experiments was considered as 100%; the relative adhesion of all other groups was normalized to that of vehicle group.

### Foam cell formation

Foam cells were generated from THP-1 cells on glass slides. THP-1 cells were exposed to phorbol myristate acetate (PMA, 100 ng/mL) for 48 hr, with subsequent oxLDL (100  $\mu\text{g}/\text{mL}$ ) exposure in the presence or absence of olaparib ( $5 \mu\text{M}$ ) and/or MCC950 ( $2 \mu\text{M}$ ). After gentle washing 3 times with ice cold 1x PBS buffer, the cells were stained with 0.2% oil red O (ORO, Sigma-Aldrich) for 10 sec. After de-staining with isopropanol for 15 sec and washing with 1xPBS for three times, the cells were stained with hematoxylin (Sigma-Aldrich) for 30 sec. After a final wash with 1x PBS, the coverslips were mounted on slides, using Permount solution (Fisher, Waltham MA).

Foam cells, identified as red-stained cells, were visualized via light microscopy (Leica Biosystems, USA) with 40 $\times$  magnification and photographed using a Canon DS126431 digital camera (Tokyo, Japan). The optical density of ORO staining, which was considered to be proportional to the amount of oxLDL taken up by macrophages, was quantified at 520 nm with SpectraMax 190 Microplate Reader (Molecular Devices, San Jose, CA).

The average optical density of ORO in the vehicle treatment group from three ( $n = 3$ ) experiments was considered as 100%; the relative optical density at 520 nm of all other groups was normalized with the vehicle group.

### Western blotting

Western blotting was performed as previously described [17]. Briefly, cell pellets were harvested and protein concentrations were determined using a BCA Protein Assay Kit (Thermo Fisher Scientific). The cell lysate proteins were separated with SDS-PAGE and transferred onto nitrocellulose membranes (Millipore). The membranes were blocked with 5% nonfat milk and incubated overnight at  $4^\circ\text{C}$  with primary antibodies. After incubation with the appropriate secondary antibodies at room temperature for 2 hr, the protein bands were detected using the Odyssey near-infrared imaging system (LI-COR Biosciences, Lincoln, NE).

### Co-immunoprecipitation

To identify selected protein-protein interactions involving the NF- $\kappa\text{B}$  pathway, co-immunoprecipitation (Co-IP) experiments were performed, as described [19]. Briefly, cell lysates (100  $\mu\text{g}$  of protein) were incubated (rocking platforms,  $4^\circ\text{C}$ , 4 h) with 2  $\mu\text{g}$  of anti-I $\kappa\text{B}\alpha$ , anti-p50, anti-p52, anti-RelA, or anti-RelB antibodies in TENDS buffer (20 mM Tris HCl, pH 8.0; 1

mM EDTA; 1 mM NaN<sub>3</sub>; 2 mM DTT; 0.25 M sucrose) with 0.5 mM 4-(2-aminoethyl) benzenesulfonyl fluoride (AEBSF), 0.5 mM benzamidine hydrochloride, and protease inhibitors. After adding 60  $\mu$ L of a 50% slurry of protein A/G-agarose in 1x PBS and incubation at 4°C overnight, the beads were washed three times with 1 mL of ice-cold 1xPBS containing 0.5 mM AEBSF.

The proteins bound to the beads were eluted in 40  $\mu$ L of loading buffer at 85°C for 10 min, separated by SDS-PAGE, and transferred onto nitrocellulose membranes, which were incubated separately with anti-p50 or anti-p52, anti-RelA or anti-RelB, and anti-I $\kappa$ B $\alpha$  antibodies. After washing with 1x Tris-buffered saline with 0.1% Tween 20 (TBST) buffer three times for 5 min each, the nitrocellulose membranes were incubated with an appropriate secondary antibody for protein detection with a LI-COR near-infrared imaging system.

### Enzyme-linked immunosorbent assay (ELISA)

IL-1 $\beta$  and IL-18 concentrations in THP1 cell supernatant were quantified by ELISA (Abcam, Cat. No. ab100562, ab46032) following the manufacturer's instruction [20].

### Statistical analysis

Data are presented as mean  $\pm$  standard deviation (SD) unless otherwise stated. All experiments were performed in triplicate or as indicated in the figure legends. Differences among three or more groups were assessed by one-way factorial ANOVA with Newman-Keuls test (GraphPad Prism, La Jolla, CA). P values <0.05 were considered statistically significant.

## Results

### OxLDL increased NLRP3 inflammasome activity

Based on observations from our and others' previous work [20, 21], we chose oxLDL concentrations of 0, 50, 100, 200  $\mu$ g/mL and duration of incubation of 0, 12, 24, and 48 hours to study the concentration-response and time course of oxLDL exposure on NLRP3 inflammasome activity in cultured THP-1 cells. As expected, oxLDL increased NLRP3 inflammasome activity, determined by the downstream protein expression of pro-IL-1 $\beta$ , in a concentration- (Fig 1A) and time-dependent (Fig 1B) manner. This increase was abrogated by pre-treatment with MCC950 (S1 Fig), a selective NLRP3 inhibitor [22].

### OxLDL increased PARP activity

PARP is activated by oxidative stress [23]. Therefore, we investigated whether oxLDL increases PARP activity, determined by the amount of free ammonia generated upon cleavage of NAD<sup>+</sup> during PARP-mediated poly-ADP-ribosylation [24]. Consistent with studies showing that PARP is activated by oxidative stress, oxLDL increased free ammonia in a concentration- (Fig 2A) and time-dependent (Fig 2B) manner.

Olaparib, a PARP inhibitor [16], inhibited the oxLDL-induced increase in PARP activity in a concentration-dependent manner (Fig 2C).

### PARP inhibition by olaparib attenuated the oxLDL-mediated increase in protein expression of NLRP3 inflammasomes

As expected, oxLDL enhanced the protein expression of NLRP3 inflammasome components, assessed by immunoblotting for NLRP3, ASC, and caspase-1 (Fig 3). By contrast, olaparib attenuated the oxLDL-induced increase in protein expression of NLRP3, ASC, and caspase-1 (Fig 3). MCC950, an NLRP3 inhibitor that served as a positive control, also attenuated the

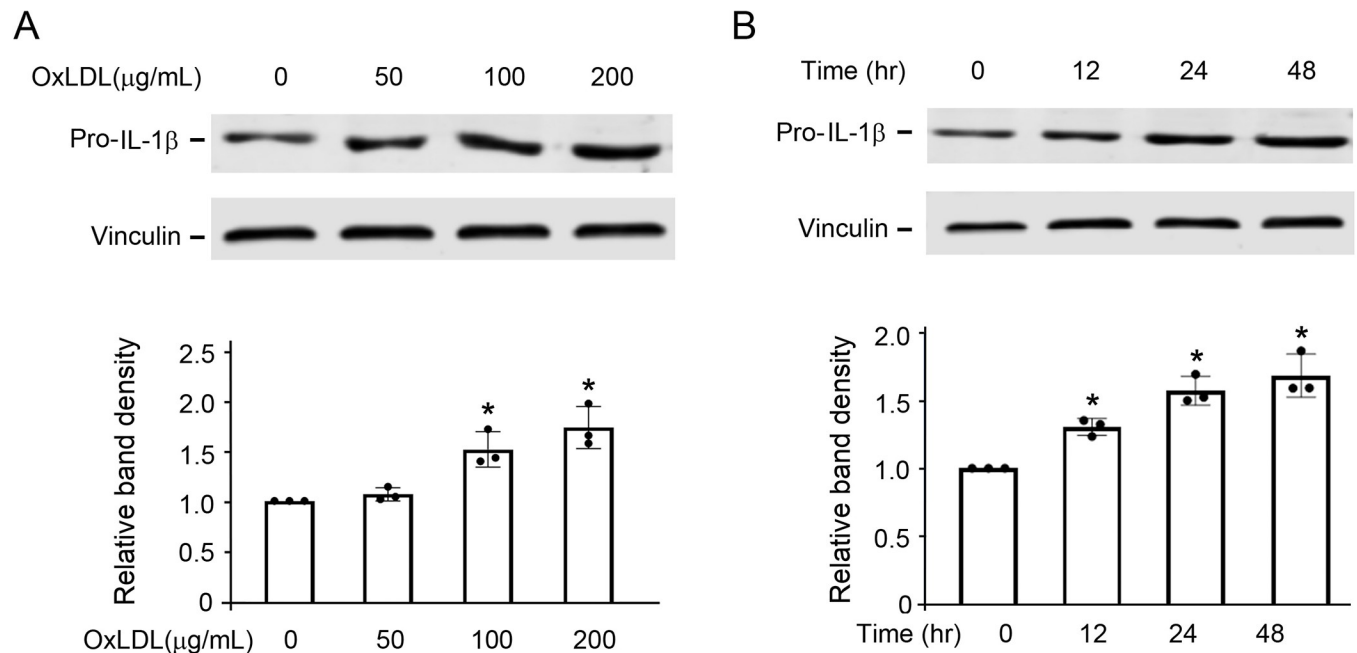

**Fig 1. Exposure to oxLDL increases pro-IL-1 $\beta$  protein expression in a concentration- and time-dependent manner.** (A) THP-1 cells were exposed to the indicated concentrations of oxLDL for 24 hr. (B) THP-1 cells were exposed to 100  $\mu$ g/mL oxLDL at the indicated time points. The band densities of pro-IL-1 $\beta$  and vinculin bands (the latter as a loading control), were normalized with the bands in the vehicle-treated cells (0  $\mu$ g/mL) from three independent experiments ( $n = 3$ /group), representing a total of seven replicates. \* $P < 0.05$  vs 0 hr, one-way ANOVA, Newman-Keuls test.

<https://doi.org/10.1371/journal.pone.0295837.g001>

oxLDL-mediated increase in the protein expression of NLRP3 inflammasomes. Of note, neither MCC950 nor olaparib, by themselves, had an effect on the protein expression of NLRP3 inflammasomes (Fig 3). These data suggested PARP inhibition by olaparib attenuated the oxLDL-mediated increase in NLRP3 inflammasomes activity.

### PARP inhibition by olaparib impaired the oxLDL-mediated increase in mitochondrial reactive oxygen species

Mitochondrial reactive oxygen species (mito-ROS) activate NLRP3 inflammasomes [25]. As expected, oxLDL exposure increased mitochondrial ROS production in THP-1 monocytes, detected by MitoSox Red, using FACS flow cytometry (Fig 4). By contrast, olaparib significantly reduced the oxLDL-mediated increase in mito-ROS production (Fig 4), which was corroborated by its inhibitory effect on the protein expression of NLRP3 inflammasomes (Fig 3). Consistent with this finding, MCC950 also reduced the oxLDL-mediated increase in mito-ROS production (Fig 4).

### PARP inhibition by olaparib attenuated the oxLDL-mediated increase in IL-1 $\beta$ and IL-18 protein expression

Following activation of NLRP3 inflammasomes, caspase-1 is activated and catalyzes the maturation of IL-1 $\beta$  and IL-18 from pro-IL-1 $\beta$  and pro-IL-18, respectively [26]; this is followed by secretion of mature IL-1 $\beta$  and IL-18 [26]. As expected, oxLDL increased the protein expressions of pro-IL-1 $\beta$  and pro-IL-18 (Fig 5) and the release of mature IL-1 $\beta$  and IL-18 into the supernatant (S2 Fig). The PARP inhibitor, olaparib, decreased the oxLDL-mediated increase in protein expression of pro-IL-1 $\beta$  and pro-IL-18 (Fig 5) and mature IL-1 $\beta$  and IL-18 into the supernatant (S2 Fig). Olaparib, in the absence of oxLDL, had no effect on the protein

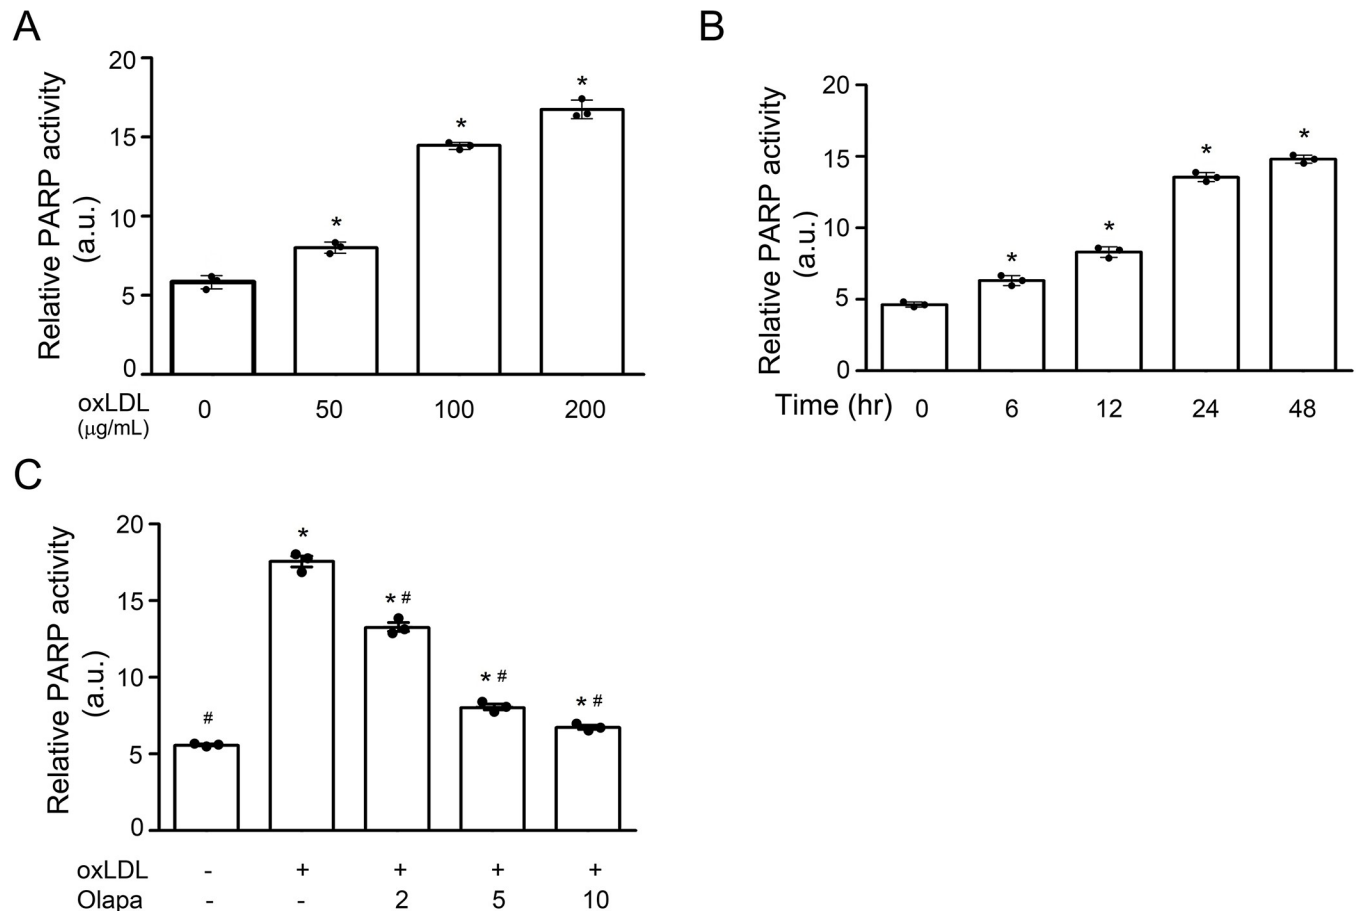

**Fig 2. Olaparib inhibits oxLDL-mediated increase in PARP activity.** (A) Human THP-1 monocytes were exposed to the indicated concentration of oxLDL for 24 hr. (B) THP-1 monocytes were exposed to 100 µg/mL oxLDL at the indicated time points. (C) THP-1 monocytes were exposed to oxLDL (100 µg/mL, 24 hr) without or with the PARP inhibitor olaparib (Olapa) at the indicated concentrations (µM, 24 hr). The data are from three independent experiments (n = 3/ group). a.u., arbitrary unit. Median and SD values are shown. \*P<0.05 vs vehicle (without oxLDL and Olapa), #P<0.05 vs oxLDL only, one-way ANOVA, Newman-Keuls test.

<https://doi.org/10.1371/journal.pone.0295837.g002>

expression of pro-IL-1 $\beta$  and pro-IL-18 (Fig 5) and mature IL-1 $\beta$  and IL-18 into the supernatant (S2 Fig). The effects of the NLRP3 inhibitor MCC950 were similar to the effects of the PARP inhibitor olaparib (Fig 5) (S2 Fig).

### PARP inhibition by olaparib attenuated oxLDL-induced monocyte adhesion and foam cell formation that are important in the atherosclerotic process

The adhesion of monocytes to the vascular endothelium is important in the initiation and progression of atherosclerosis [27]. OxLDL markedly increased the adhesion of monocytes to HUVEC monolayers and this was decreased by either olaparib or MCC950 (Fig 6A). Neither olaparib nor MCC950, by itself, had an effect on the adhesion of monocytes to the HUVECs under basal conditions (Fig 6A).

Activated NLRP3 inflammasomes within macrophages participate in the pathogenesis of atherosclerosis by increasing formation of foam cells [28]. We, therefore, investigated the consequences of PARP inhibition on foam cell formation. As expected, oxLDL markedly increased foam cell formation, identified by ORO, which was decreased by either the PARP inhibitor

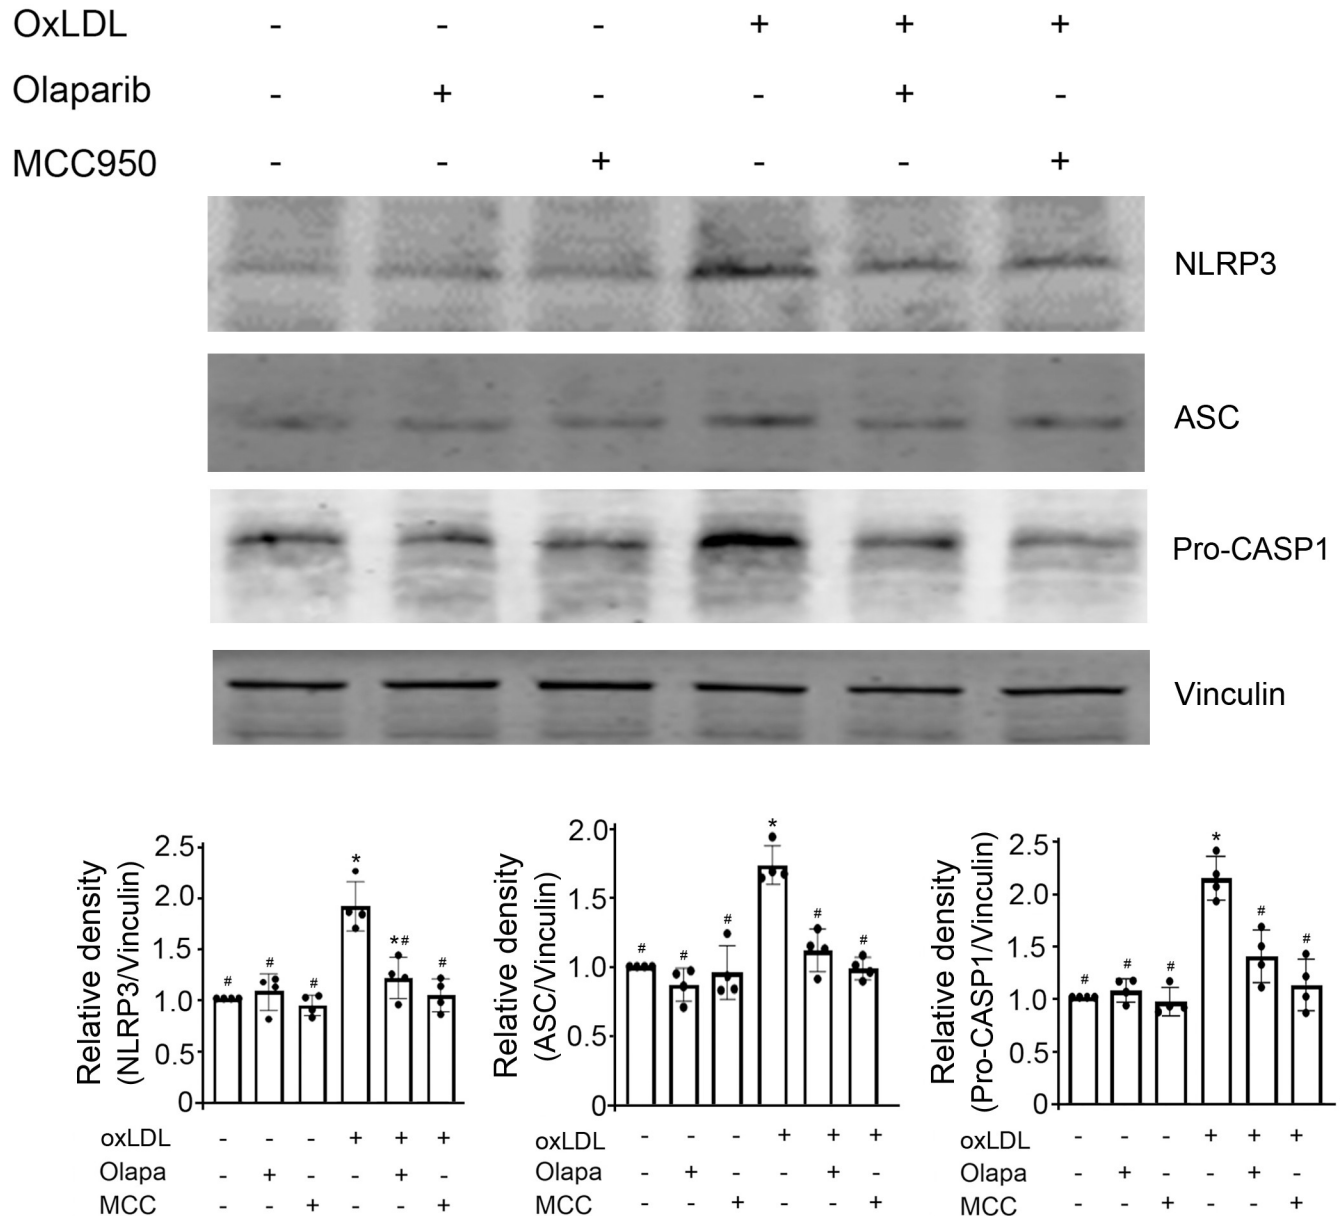

**Fig 3. Olaparib inhibits oxLDL-mediated NLRP3 inflammasomes activity.** THP-1 monocytic cells were exposed to oxLDL, the PARP inhibitor olaparib (Olapa), or the NLRP3 inhibitor MCC950 (MCC), individually or in combination as indicated. Proteins in cell lysates were detected with anti-NLRP3, anti-ASC, and anti-pro-caspase-1 (pro-CASP1) antibodies, as indicated. The band densities, relative to vinculin (loading control) were quantified using ImageJ (NIH, Bethesda, MD). N = 4/group, \* P<0.05 vs vehicle (without oxLDL, Olapa, and MCC), \*P<0.05 vs oxLDL only, one-way ANOVA, Newman-Keuls test.

<https://doi.org/10.1371/journal.pone.0295837.g003>

olaparib or MCC950 (Fig 6B). Neither olaparib nor MCC950, by itself, had an effect on foam cell formation under the baseline condition (Fig 6B).

### PARP inhibition by olaparib inhibited oxLDL-mediated NF-κB activity through the canonical and non-canonical NF-κB pathway

Activation of NLRP3 inflammasomes requires two stimuli: a priming stimulus and an activating stimulus. NF-κB activation is important in priming NLRP3 inflammasomes [11, 29]. The



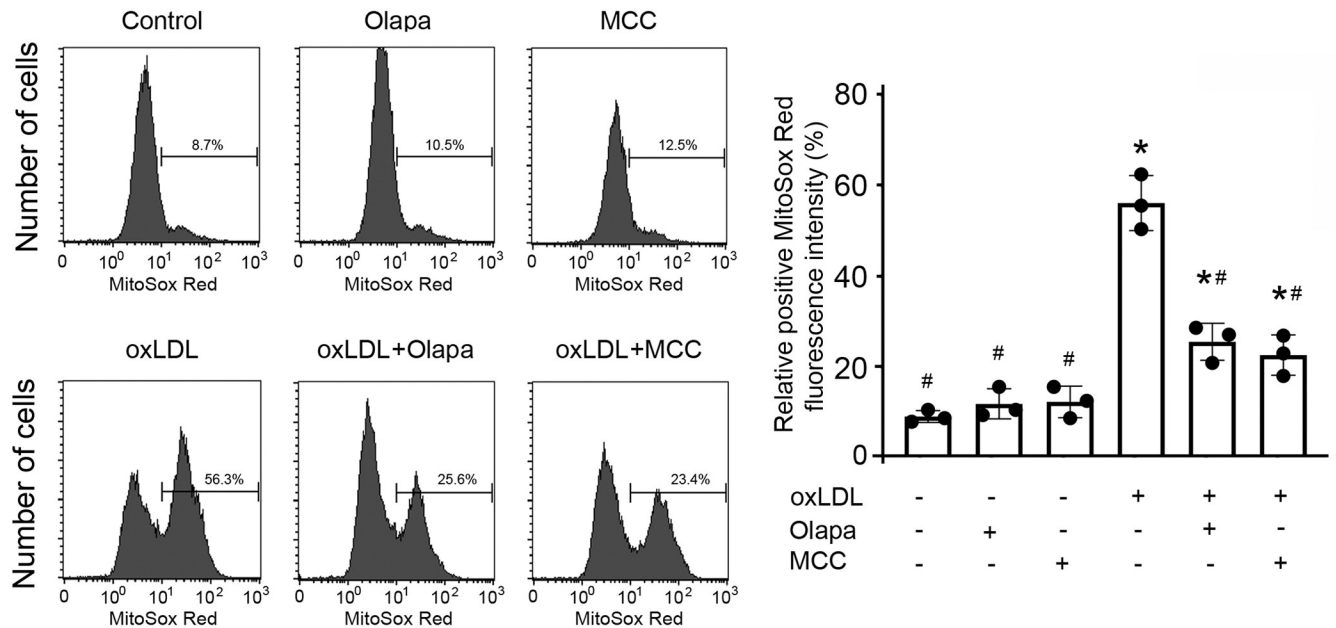

**Fig 4. Olaparib inhibits oxLDL-enhanced mitochondrial ROS production.** THP-1 monocytes were exposed to oxLDL, the PARP inhibitor olaparib (Olapa), or the NLRP3 inhibitor MCC950 (MCC), individually or in combination, as indicated. Mitochondrial ROS production was measured by MitoSox Red fluorescence intensity using flow cytometry. Median and SD values are summarized from three independent experiments ( $n = 3/\text{group}$ ). \* $P < 0.05$  vs vehicle, # $P < 0.05$  vs oxLDL only, one-way ANOVA, Newman-Keuls test.

<https://doi.org/10.1371/journal.pone.0295837.g004>

critical step in NF- $\kappa$ B activation is the phosphorylation of I $\kappa$ B $\alpha$  by IKK complex [13, 14, 30]. Therefore, we next investigated the effect of olaparib on protein expression of IKK and phospho-I $\kappa$ B $\alpha$ . The expression of IKK- $\alpha$  and phospho-I $\kappa$ B $\alpha$  were markedly increased by oxLDL, an effect that were decreased by either olaparib or the inflammasome inhibitor MCC950 (Fig 7). Neither olaparib nor MCC950, by itself, had an effect on the IKK- $\alpha$  protein expression or I $\kappa$ B $\alpha$  phosphorylation (Fig 7). These results indicate that Olaparib inhibited oxLDL-mediated increase in NF- $\kappa$ B activity.

NF- $\kappa$ B can be activated through canonical or non-canonical pathway [14]. The RelA/p50 heterodimer is released from binding with I $\kappa$ B $\alpha$  through canonical pathway upon phosphorylation of I $\kappa$ B $\alpha$  [14]. Consistently, anti-I $\kappa$ B $\alpha$  co-immunoprecipitated with RelA and p50 (Fig 8A), and anti-RelA complementarily co-immunoprecipitated I $\kappa$ B $\alpha$  (Fig 8B) and p50 (Fig 8B). The co-immunoprecipitations of I $\kappa$ B $\alpha$  with RelA or p50 were significantly decreased with oxLDL exposure, but these were restored by the combined exposure to oxLDL and olaparib (Fig 8).

These results indicate that oxLDL activated NF- $\kappa$ B, leading to the dissociation of I $\kappa$ B $\alpha$  from the RelA/p50 heterodimer. By contrast, olaparib inhibited NF- $\kappa$ B activation and the dissociation of I $\kappa$ B $\alpha$  from RelA/p50; I $\kappa$ B $\alpha$  then reassembled with the RelA/p50 heterodimer. Interestingly, the co-immunoprecipitation of RelA with p50 was not affected by oxLDL and/or olaparib (Fig 8B), indicating that the stability of RelA/p50 heterodimers was not affected by oxLDL exposure or PARP inhibition. These co-immunoprecipitation results suggest that oxLDL and PARP inhibition regulates NF- $\kappa$ B activity through modulating the disassembly and reassembly of NF- $\kappa$ B subunits and the nuclear transport of RelA/p50 subunit.

In addition to the canonical pathway, NF- $\kappa$ B activation also occurs via a non-canonical NF- $\kappa$ B signaling pathway [31]. Therefore, we investigated the effects of oxLDL and olaparib

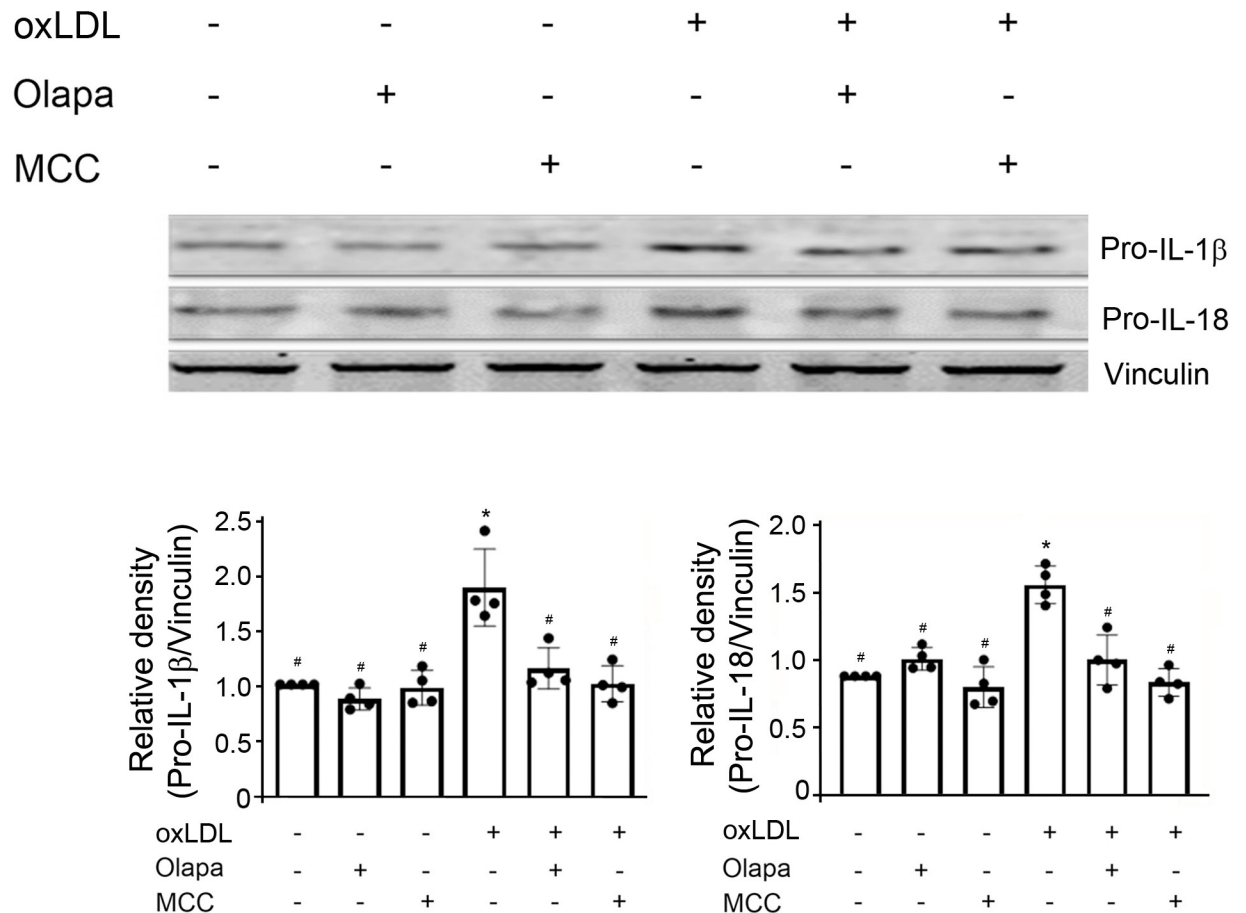

**Fig 5. Olaparib attenuates the oxLDL-mediated increase in pro-IL-1 $\beta$  and pro-IL-18 protein expression.** THP-1 monocytes were exposed to oxLDL, the PARP inhibitor olaparib (Olapa), or the NLRP3 inhibitor MCC950 (MCC), individually or in combination as indicated. Cell lysates were subjected to SDS-PAGE and immunoblotted with anti-pro-IL-1 $\beta$  (top), anti-pro-IL-18 (middle) or anti-vinculin antibody (bottom, for loading control). The densities of pro-IL-1 $\beta$ , pro-IL-18 over vinculin were quantified by densitometry and normalized to vehicle. The band densities, relative to vinculin, were quantified using ImageJ (NIH, Bethesda, MD). N = 4/group, \*P < 0.05 vs vehicle, #P < 0.05 vs oxLDL only, one-way ANOVA, Newman-Keuls test.

<https://doi.org/10.1371/journal.pone.0295837.g005>

on non-canonical NF- $\kappa$ B activation. The central signaling component of the non-canonical NF- $\kappa$ B pathway is that of NF- $\kappa$ B-inducing kinase (NIK), which induces p100 phosphorylation via the activation of the kinase IKK $\alpha$ . Ox-LDL increased NIK protein expression and the phosphorylation of p100 (Fig 9). Either olaparib or MCC950 attenuated the ox-LDL-mediated increase in NIK and phospho-p100 protein expression (Fig 9), whereas both olaparib and MCC950, by themselves, had no effect on NIK and phospho-p100 protein expressions (Fig 9). These results indicate that olaparib inhibits ox-LDL-mediated increase in NF- $\kappa$ B activation also through the non-canonical NF- $\kappa$ B pathway.

Anti-I $\kappa$ B $\alpha$  co-immunoprecipitated with RelB and p52 (S3 Fig), and anti-RelB complementarily co-immunoprecipitated with I $\kappa$ B $\alpha$  and p52 (S3 Fig). The co-immunoprecipitations of I $\kappa$ B $\alpha$  with RelB and p52 were decreased with oxLDL exposure, and these were restored by the combined exposure of oxLDL and olaparib (S3 Fig). These results indicate that PARP inhibition by olaparib inhibited oxLDL-mediated activation of NF- $\kappa$ B through the non-canonical pathway, leading to the dissociation of I $\kappa$ B $\alpha$  from the RelB/p52 heterodimer.

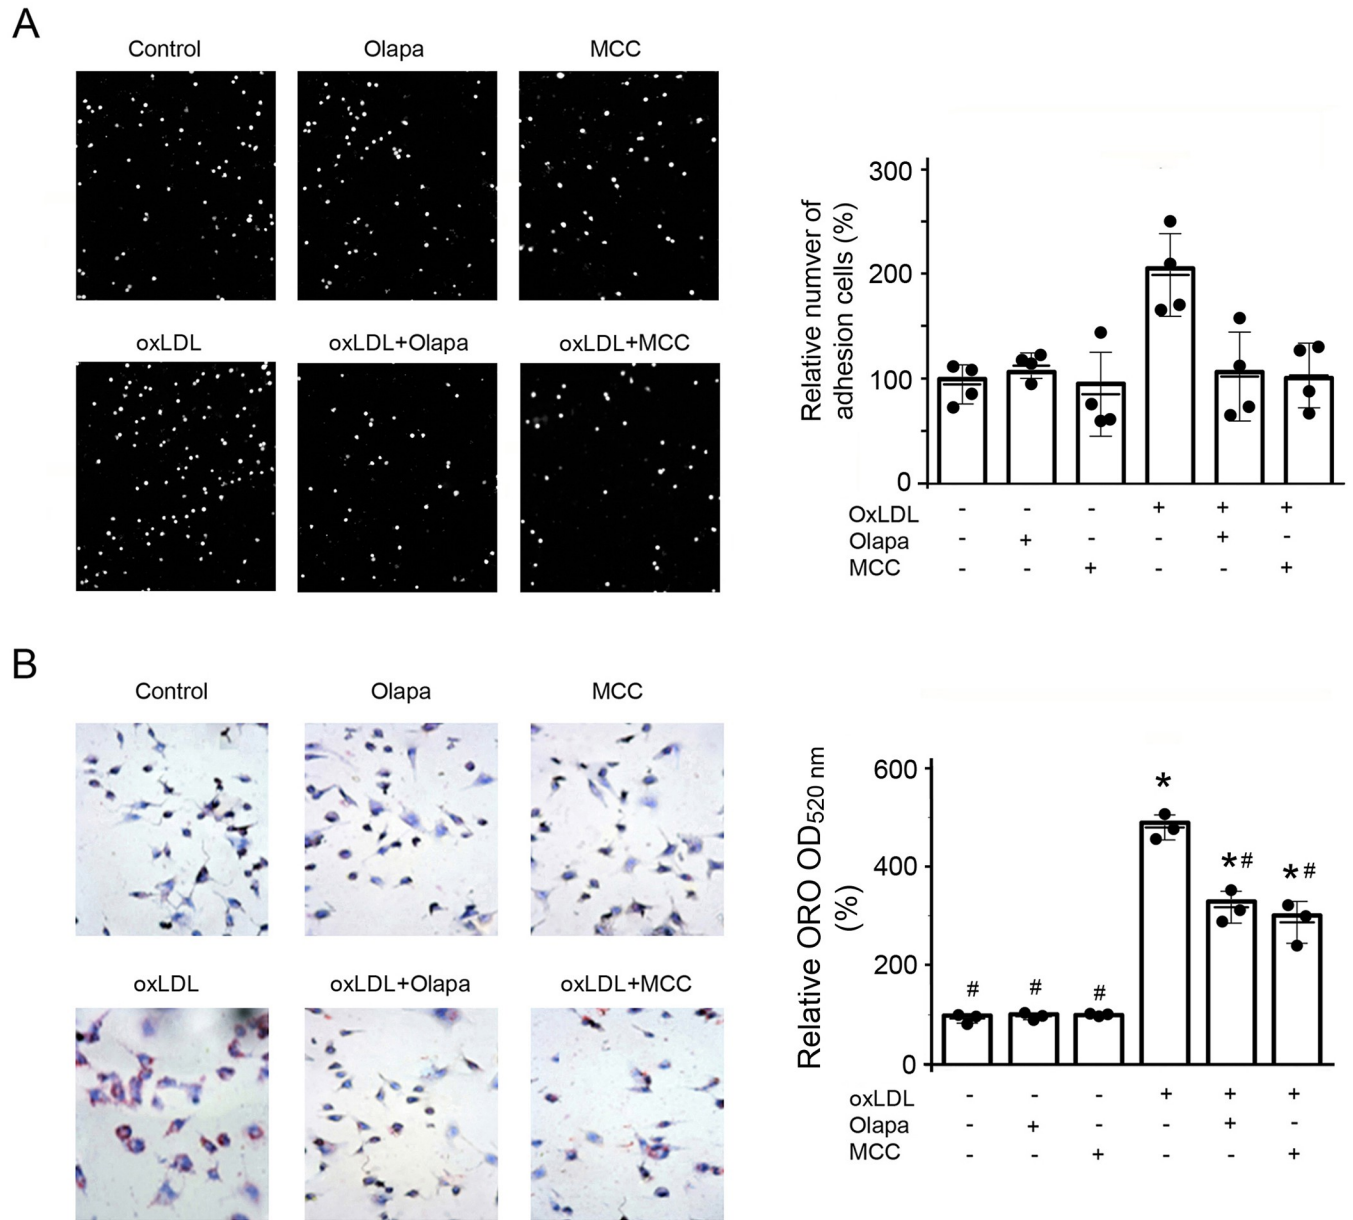

**Fig 6. Olaparib inhibits oxLDL-induced monocyte adhesion and foam cell formation.** (A) THP-1 monocytes were exposed to oxLDL, the PARP inhibitor olaparib (Olapa), or the NLRP3 inhibitor MCC950 (MCC) as indicated. The monocytes attached to human umbilical vein endothelial cells (HUVECs) were counted using an inverted light microscope and analyzed by ImageJ software (NIH, Bethesda). Data are from four independent experiments (n = 4/group). \*P<0.05 vs vehicle, #P<0.05 vs oxLDL only, one-way ANOVA, Newman-Keuls test. (B) THP-1 cells were exposed to PMA followed by compounds as in (A) as described in Methods section. Formation of foam cells was assayed by oil red-O staining and imaged by an inverted light microscope. ORO, oil red-O staining. Data are from three independent experiments (n = 3/group). Median and SD values are shown. \*P<0.05 vs vehicle, #P<0.05 vs oxLDL only, one-way ANOVA, Newman-Keuls test.

<https://doi.org/10.1371/journal.pone.0295837.g006>

### PARP inhibition by olaparib suppressed NF-κB-targeted gene *VCAM1* coded protein expression

*VCAM-1*, encoding vascular cell adhesion molecule-1, is a well-established NF-κB target gene and the protein product is associated with atherosclerosis [32]. We investigated whether olaparib affected the protein expression of VCAM-1. OxLDL increased VCAM-1 protein

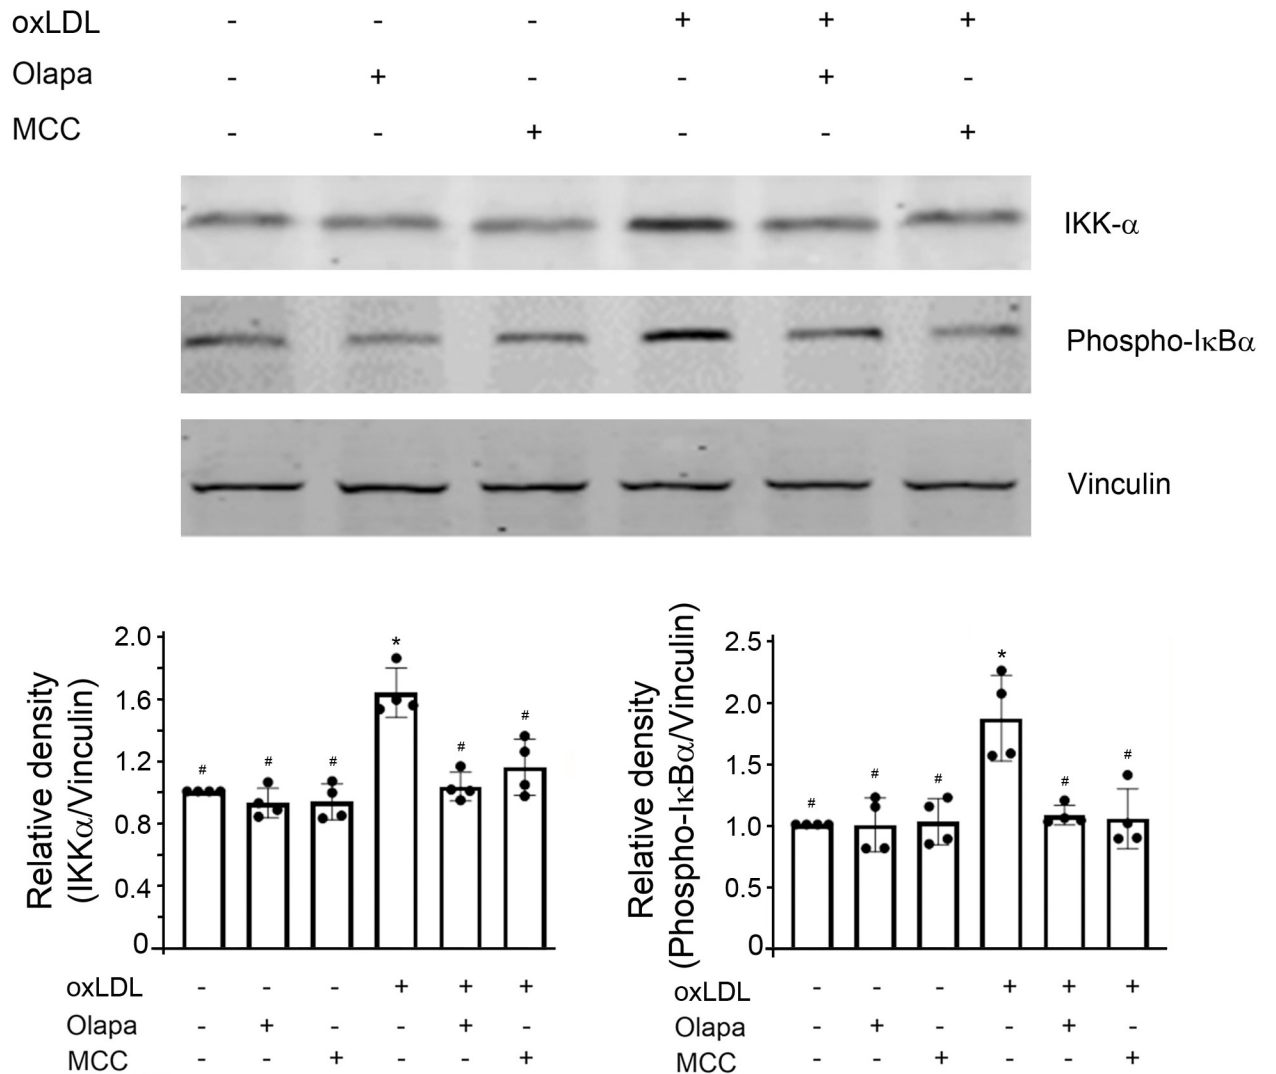

**Fig 7. Olaparib inhibits oxLDL-induced increase in NF- $\kappa$ B activity.** The THP-1 monocytes were exposed to oxLDL, the PARP inhibitor olaparib (Olapa), or the NLRP3 inhibitor MCC950 (MCC) as indicated. The cell lysates were subjected to SDS-PAGE and immunoblotted with anti-IKK- $\alpha$  (top), anti-phospho-I $\kappa$ B $\alpha$  (middle) or anti-vinculin antibody (bottom, for loading control), as indicated. The band densities, relative to vinculin, were quantified using ImageJ (NIH, Bethesda, MD). N = 4/group, \*P<0.05 vs vehicle, #P<0.05 vs oxLDL only, one-way ANOVA, Newman-Keuls test.

<https://doi.org/10.1371/journal.pone.0295837.g007>

expression which was suppressed by either olaparib or MCC950 (Fig 10), consistent with their roles in the pathogenesis of atherosclerosis (Fig 6). Neither olaparib nor MCC950, alone, had effect on the protein expression of VCAM-1.

## Discussion

This study demonstrated that oxLDL, acting on THP1 monocytes, increased NLRP3 inflammasome and PARP activity, and that PARP inhibition by olaparib inhibited oxLDL-induced PARP and NLRP3 inflammasome activity. The effect of olaparib was in direction and magnitude similar to that caused by MCC950, a potent NLRP3 inhibitor [22]. Additional experiments showed that PARP inhibition by olaparib inhibited the production of Mito-ROS, which is upstream of NLRP3 inflammasome activation, and inhibited subsequent downstream IL-1 $\beta$

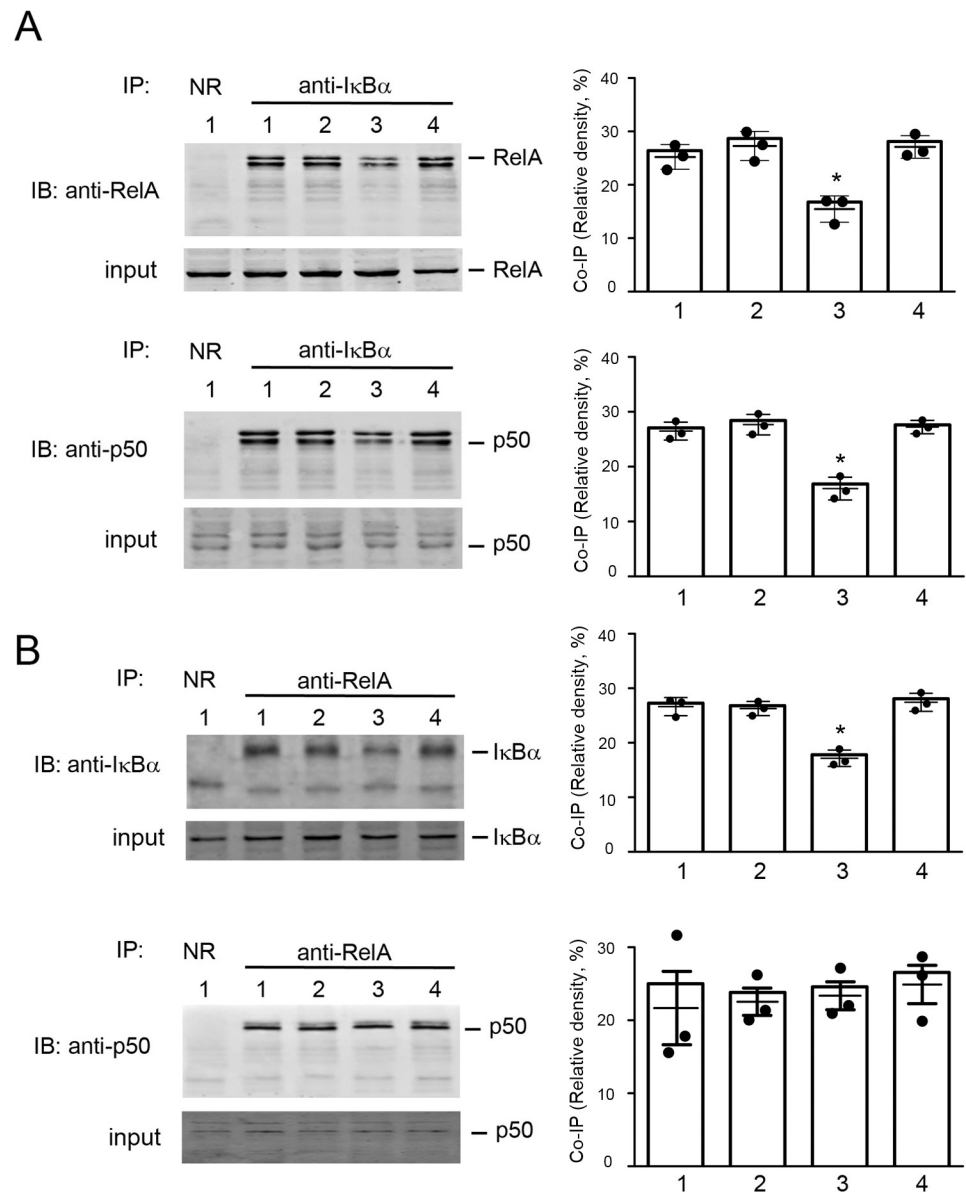

**Fig 8. Olaparib reverses the oxLDL-mediated decrease in co-immunoprecipitation of IκBα with RelA or p50.** Cell lysates were obtained from THP-1 monocytes exposed to reagents as indicated: Lane 1, vehicle; Lane 2, PARP inhibitor olaparib (5 mM, 24 hr); Lane 3, oxLDL (100 mg/mL, 24 hr) or Lane 4, combination of oxLDL and olaparib. Protein complexes, co-immunoprecipitated with the indicated antibodies, were separated by SDS-PAGE and immunoblotted with the antibodies, as indicated. NR, normal rabbit IgG. Relative band densities from three independent experiments were analyzed. (A) OxLDL decreased co-immunoprecipitation of IκBα with both RelA and p50, and olaparib reversed the effect of oxLDL on the dissociation of IκBα with RelA and p50. (B) OxLDL decreased co-immunoprecipitation of RelA with IκBα but not with p50, and olaparib reversed the effect of oxLDL on the co-immunoprecipitation of RelA with IκBα. The data are from three independent experiments (n = 3/group). \*P<0.05 vs vehicle (Lane 1), one-way ANOVA, Newman-Keuls test.

<https://doi.org/10.1371/journal.pone.0295837.g008>

and IL-18 protein expressions. This led to the inhibition of monocyte adhesion to endothelial cells and foam cell formation.

NF-κB activation occurs via both canonical and non-canonical NF-κB signaling pathways. The canonical pathway mediates the activation of p50, RelA, and c-REL through activation of

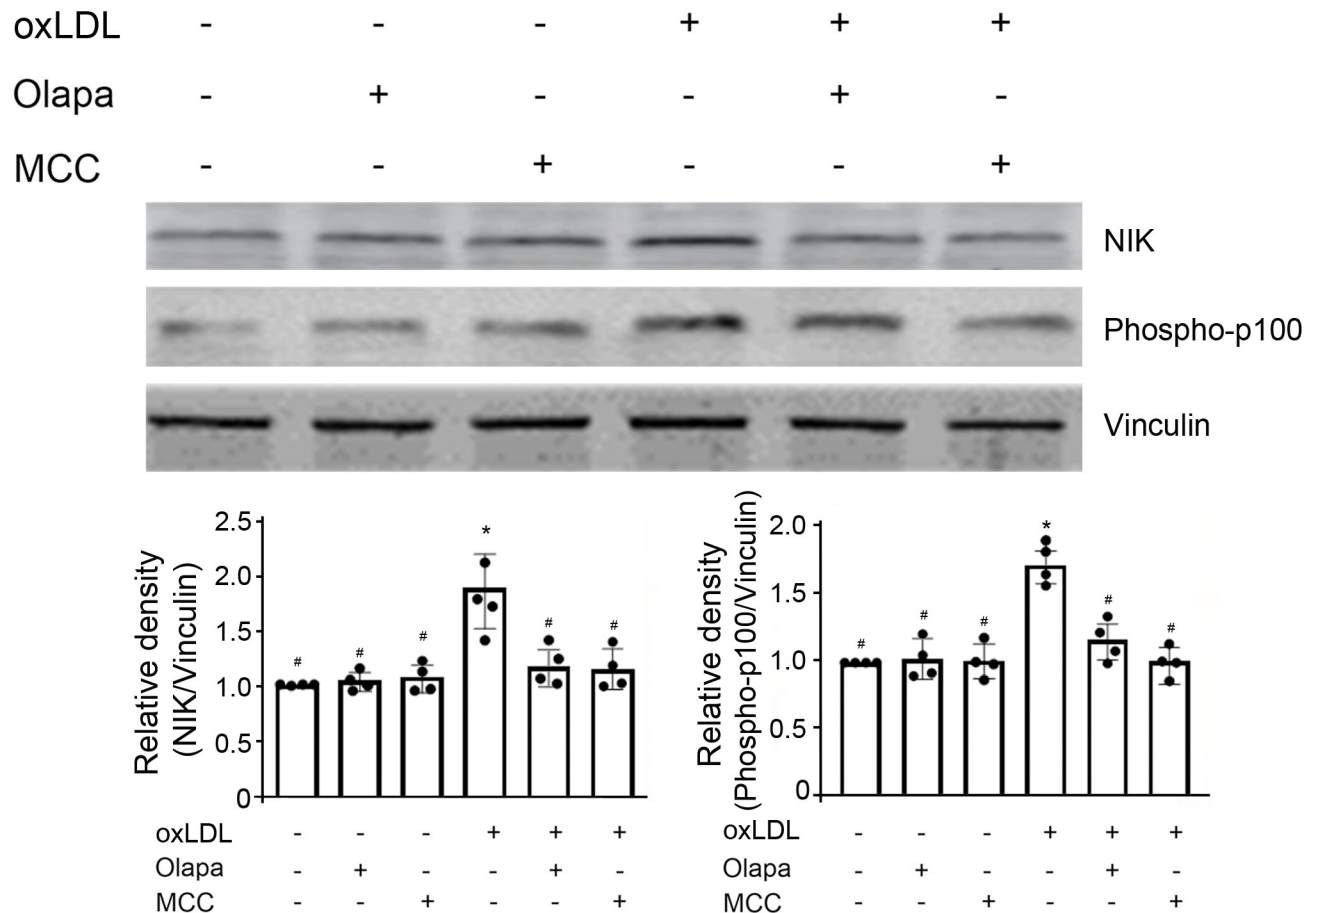

**Fig 9. Olaparib inhibits oxLDL-induced NIK protein expression and p100 phosphorylation.** The THP-1 monocytes were exposed to oxLDL, the PARP inhibitor olaparib (Olapa), or the NLRP3 inhibitor MCC950 (MCC), as indicated. The cell lysates were subjected to SDS-PAGE and immunoblotted with anti-NIK (top), anti-phospho-p100 (middle) or anti-vinculin antibody (bottom, for loading control), as indicated. The band densities, relative to vinculin, were quantified using ImageJ (NIH, Bethesda, MD). N = 4/group, \*P<0.05 vs vehicle, #P<0.05 vs oxLDL only, one-way ANOVA, Newman-Keuls test.

<https://doi.org/10.1371/journal.pone.0295837.g009>

I $\kappa$ B kinase (IKK) complex (comprised of heterodimer of IKK $\alpha$  and IKK $\beta$  catalytic subunits (and regulatory subunit, IKK $\gamma$ /NEMO) [33], whereas the non-canonical NF- $\kappa$ B pathway activates p100-sequestered NF- $\kappa$ B members, predominantly p52 and RelB [31]. NIK is the central component of non-canonical pathway, which induces phosphorylation of p100 through IKK $\alpha$  activation [31]. The canonical and non-canonical NF- $\kappa$ B pathways are interlinked [34]. Phosphorylation of IKK $\alpha$  and IKK $\beta$  occurs concurrently in endogenous systems, and phosphorylated IKK $\beta$  subunit phosphorylates its adjacent IKK $\alpha$  subunit [33, 34]. The olaparib-mediated decrease in protein expression of NLRP3 inflammasomes is associated with decreased NF- $\kappa$ B activity. PARP inhibition by olaparib attenuated the oxLDL-mediated increase in I $\kappa$ B $\alpha$  phosphorylation, which in turn restored the sequestration of I $\kappa$ B $\alpha$  with NF- $\kappa$ B RelA/p50 and RelB/p52 heterodimers. The resulting decrease in the expression of the NF- $\kappa$ B target gene *VCAM-1* is expected to curtail the initiation and progression of atherosclerosis.

Atherosclerosis is a chronic inflammatory disease, characterized by local and systemic inflammation involving the innate immune system, with monocytes/macrophages playing an important role [35]. In early-stage atherosclerosis, monocytes/macrophages recognize and internalize oxLDL [7]; NLRP3 inflammasomes are activated and macrophages differentiate

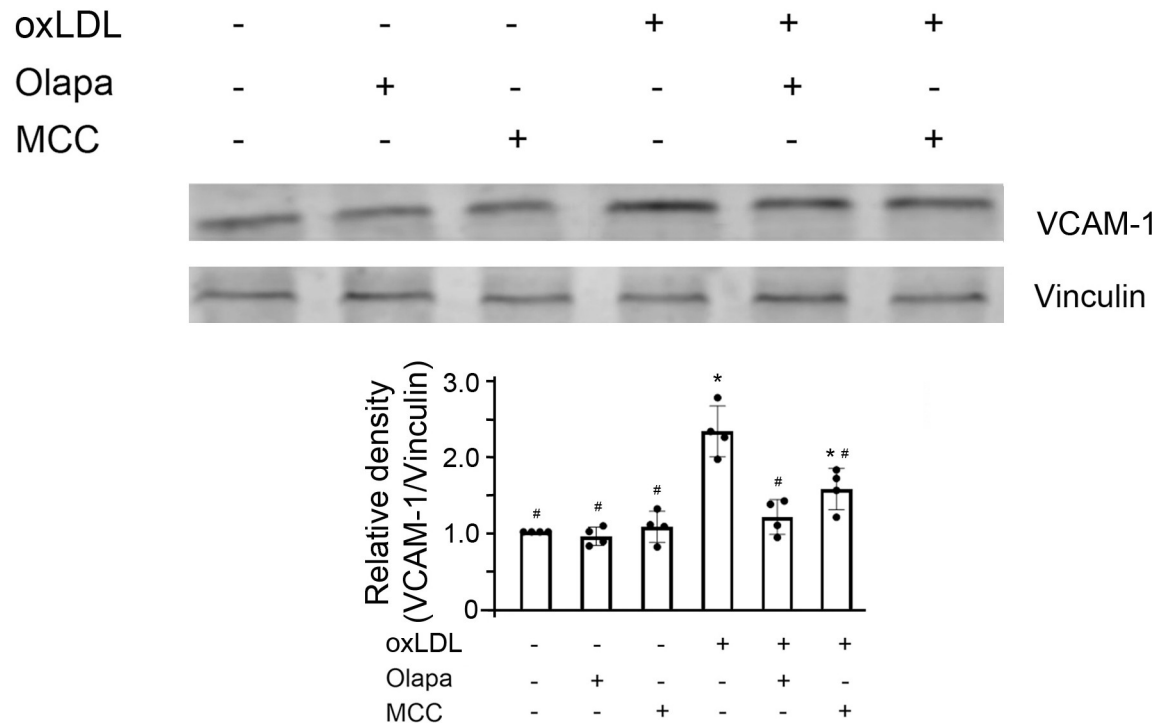

**Fig 10. Olaparib suppresses oxLDL-enhanced NF- $\kappa$ B target-gene VCAM-1 protein expression in THP-1 monocytes.** The cells were exposed to oxLDL, the PARP inhibitor olaparib (Olapa), or the NLRP3 inhibitor MCC950 (MCC), as indicated. The cell lysates were subjected to SDS-PAGE and immunoblotted with anti-VCAM-1 (upper panel) or anti-vinculin antibody (lower panel). The band densities, relative to vinculin (loading control), were quantified using ImageJ (NIH, Bethesda, MD).  $N = 4/\text{group}$ , \*  $P < 0.05$  vs vehicle, #  $P < 0.05$  vs oxLDL only, one-way ANOVA, Newman-Keuls test. VCAM-1, vascular cell adhesion molecule 1.

<https://doi.org/10.1371/journal.pone.0295837.g010>

into foam cells. The inhibition of NLRP3 inflammasomes by MCC950 or by silencing NLRP3 with a specific siRNA [20] reduces the production of pro-inflammatory cytokines and prevents the transformation of macrophages into foam cells, by suppression of oxLDL uptake and enhancement of cholesterol efflux. In late-stage atherosclerosis, NLRP3 inflammasomes induce macrophage cell death by pyroptosis, releasing IL-1 $\beta$ , IL-18, and inflammatory lipids, which increase plaque size and vulnerability to vessel rupture [8, 36].

ROS play a crucial role in the activation of NLRP3 inflammasomes [37]. A recent study has demonstrated that ATP-induced ROS production increases NLRP3 inflammasome activity through interaction with thioredoxin-interacting protein [38]. There are two major intracellular ROS sources: mitochondria-derived ROS and NADPH oxidase-derived ROS [39]. Experiments in multiple cell systems show that activation of NLRP3 inflammasomes is independent of NADPH oxidase [40, 41]. Therefore, mitochondria-derived ROS are critical for NLRP3 inflammasome activation [42, 43]. The present study measured mito-ROS using MitoSox Red with flow cytometry [18], demonstrating that oxLDL increased mito-ROS production and activated NLRP3 inflammasomes, and that olaparib attenuated oxLDL-mediated increase in mito-ROS and activation of NLRP3 inflammasomes. This indicates that the inhibition of PARP by olaparib on oxLDL-mediated NLRP3 inflammasome activity is via the canonical pathway and is mito-ROS dependent. Although mito-ROS are widely detected with MitoSox Red probe at low concentrations, it is recommended to independently verify mito-ROS production [44]. It is a limitation of this study that only a single method was used to determine mito-ROS level without normalization with factors like plasma membrane potential and mitochondrial membrane potential that affect the fluorescence probe accumulation [44]. Liquid chromatography-

tandem mass spectrometry, which overcomes limitations of spectral overlap and nonspecific fluorescence spectra [45], will be used in the future studies.

In addition to oxidative stress associated with mito-ROS, mitochondrial dysfunction (*e.g.*, mtDNA release, defective mitochondrial membrane potential, aberrant mitochondrial dynamics, impaired mitochondrial homeostasis) are also major drivers for the activation of NLRP3 inflammasomes, intensifying the NLRP3 inflammasome-mediated pro-inflammatory responses [25, 41, 46]. Whether or not olaparib regulates NLRP3 inflammasome activity through mitochondrial dynamics, membrane integrity and homeostasis, and noncanonical pathway such as caspase-11 warrants further investigation.

Oxidative stress activates PARP [23]. The present study showed that oxLDL increased PARP activity in a concentration- and time-dependent manner. ROS overproduction damages nucleobases and sugar moieties in DNA, forming various oxidized bases and transition and transversion mutations, and DNA breaks [47], all of which pose a serious threat to genome integrity [48]. PARP enzymes sense these forms of DNA damage, so that proteins containing PAR-binding modules can be recruited to sites of DNA breaks in a PAR-dependent manner [48]. PARP-1 catalyzes the poly ADP-ribosylation reaction by transferring ADP-ribose to target proteins, resulting in long, branched chains of poly ADP-ribose [49]. These negatively-charged polymers, acting through NF- $\kappa$ B [13, 30], induce diverse pro-inflammatory responses in monocytes/macrophages and other immune cells [50, 51].

NF- $\kappa$ B is the master inducer of proinflammatory responses linked to oxidative stress [14, 29]. Inhibition of NF- $\kappa$ B activation, whether accomplished pharmacologically or by gene knockout of I $\kappa$ B or IKK, decreases the expression of pro-inflammatory cytokines, chemokines, intercellular adhesion molecule 1, and other inflammation-related molecules [13, 29, 30]. Accumulating evidence shows that PARP positively regulates NF- $\kappa$ B activity and increases inflammatory responses [52]. The mechanisms by which PARP increases NF- $\kappa$ B activity are not well understood. It has been reported that PARP-1 transiently interacts with NF- $\kappa$ B and acts as a coactivator of NF- $\kappa$ B in regulating gene expression [53, 54]. PARP-1 facilitates NF- $\kappa$ B binding to specific DNA elements located in promoters and enhancers of target genes [55]. PARP-1 also regulates the activities of other transcription factors, increasing NF- $\kappa$ B-dependent expression of target genes [54]. Binding of PARP-1 with p300/CBP allows the acetylation of PARP-1 and facilitates binding of p300 and p50 subunit to p300/CBP, resulting in the full activation of NF- $\kappa$ B and thereby promoting the transcription of inflammatory mediators [3]. PARP1-mediated PARylation of histones at transcriptionally active chromatin regions and targeted gene promoters facilitates NF- $\kappa$ B recruitment to these promoters [56]. It is established that the DNA-binding of PARP, rather than the catalytic activity of PARP on PARylation of NF- $\kappa$ B, enhances the transcriptional activity of PARP [54, 57]. Consistent with this model is the finding in the current study that PARP1 is crucial for the assembly of NLRP3 inflammasomes and their activation.

The deactivation of PARP results in inhibition of NF- $\kappa$ B and decrease in proinflammatory cytokine expression [52, 53]. The present results showed that oxidative stress induced by oxLDL increased mito-ROS production, PARP activity, and the phosphorylation of I $\kappa$ B $\alpha$ . These factors caused the dissociation of I $\kappa$ B $\alpha$  from RelA/p50 or RelB/p52 and the activation of NF- $\kappa$ B. PARP inhibition by olaparib attenuated oxLDL-induced I $\kappa$ B $\alpha$  phosphorylation. These actions restored the association of I $\kappa$ B $\alpha$  with RelA/p50 and RelB/p52 heterodimers and consequently prevented NF- $\kappa$ B nuclear translocation and activation.

The present study identified an additional and novel mechanism for PARP-mediated NF- $\kappa$ B activation, through its modulation of its subunit I $\kappa$ B $\alpha$  with RelA/p50 and RelB/p52 assembly. PARP-mediated NF- $\kappa$ B activation occurs in the cytoplasm and for the first time relates this effect to the pathogenesis of atherosclerosis. This mechanism operates upstream of NF- $\kappa$ B



nuclear translocation. PARP-1 is responsible for 80–90% of total PARP activity [2, 4] and was initially considered to be located exclusively in the nucleus [4, 42]. However, recent studies suggest that PARP-1 is also present and active in the cytosol [58]. Among the 17 human PARPs [59], PARP-1, -2, -5A, -5B, and -6 catalyze poly-ADP-ribosylation [50] and may participate in the oxLDL-mediated NF- $\kappa$ B activation. Olaparib forms a hydrogen bond with PARP-1 residue Y896. Olaparib also has a hydrophobic interaction with H862 of the PARP-1 catalytic HYE amino acid triad (histidine-tyrosine-glutamic acid) HYE forms both hydrophobic interactions and hydrogen bonds with other residues in the binding pocket of PARP1 [60]. Five PARPs (PARP-1, -2, -4, -5A, -5B) share the conserved HYE tripeptide [3]. Therefore, olaparib may bind the cytosolic domain of these PARPs, inhibit PARP activity, and abrogate the oxLDL-induced NF- $\kappa$ B nuclear translocation and activation.

Recent evidence indicates that NF- $\kappa$ B activation is promoted, not only by poly ADP-ribosylated PARPs, but also by certain mono-ADP-ribosylated PARPs (*e.g.*, PARP-10, -12) [61, 62]. In mouse bone marrow-derived macrophages, NLRP3 is directly poly-ADP-ribosylated by PARP-1 [38], which provides an additional mechanism for NLRP3 inflammasome activation by PARP-1. Nevertheless, identification of potential PARP-1 substrates and the PARP isoform(s) responsible for the oxLDL-mediated NF- $\kappa$ B translocation and activation in THP-1 cells warrant further investigation.

In addition to olaparib and other exogenous PARP inhibitors, endogenous enzymes, such as poly-(ADP-ribose) glycohydrolase (PARG), ADP-ribosyl hydrolase-3 (ARH3), and macrodomain-containing terminal ARHs, including MacroD1, MacroD2, and C6orf130 enzymes, suppress PARP activity [2, 49]. Under oxidative stress, ribosylated cytoplasmic polymers, the product of long, branched chain of poly-ADP ribose from PARP activity, are translocated from the nucleus to the cytoplasm. There, poly-ADP ribose promotes release of apoptosis-inducing factors from the outer mitochondrial surface into the cytoplasm. Poly-ADP ribose is also translocated back to the nucleus and induces DNA fragmentation and chromatin condensation, resulting in cellular necrosis [2, 49]. Furthermore, PARP hyperactivation consumes NAD<sup>+</sup> and depletes cellular ATP, also promoting cell death [3, 4].

OxLDL induces cleavage of PARP-1 protein in a concentration- and time-dependent manner in THP-1 cells, which indicates potential roles of PARP-mediated parthanatos (a form of programmed cell death) in the death of monocytes/macrophages and foam cells, lipid release, and subsequent development of atherosclerosis. Macrophage phenotypes are heterogeneous, with extremes of classically activated (M1) and alternatively-activated (M2) macrophages; M1 is pro-inflammatory and M2 is anti-inflammatory [63]. Particular stages of atherosclerosis progression are associated with the presence of particular macrophage subtypes. Thus, M1 macrophages dominate in advanced atherosclerosis and M2 macrophages accumulate in plaque regression [64]. Induction of specific macrophage functions is probably closely related to the activities of PARP- and PAR-degrading enzymes in the local environment that orchestrate macrophage function.

Conventionally, PARP is known for its roles in DNA repair, stress response, cell division and differentiation, and cancer development and progression. The present study has demonstrated the role of PARP in modulating inflammatory responses through assembly/disassembly of NF- $\kappa$ B subunits ( $\text{I}\kappa\text{B}\alpha$  with either RelA/p50 or RelB/p52) in monocytes/macrophages, major participants in the pathogenesis of atherosclerosis. The phagocytosis of oxLDL activates NLRP3 inflammasomes in THP-1 cells; here we show that PARP has a similar effect. PARP inhibition by olaparib, a drug approved by the US Food and Drug Administration for BRCA-mutated ovarian cancer. Olaparib and other PARP inhibitors have been widely studied in pre-clinical and clinical applications in oncologic and non-oncologic diseases.

In C57BL/6 mice subjected to cecal ligation and puncture, olaparib attenuates circulating IL-1 $\beta$  levels, exerts anti-inflammatory effects, and plays organ protective roles, without adversely affecting DNA integrity [65]. In BALB/c mice, intraperitoneal injection of olaparib ameliorates ovalbumin-induced oxidative stress and NF- $\kappa$ B activation and attenuates maturation of IL-1 $\beta$  and NLRP3 inflammasome activity [66]. In transgenic R6/2 mice, intraperitoneal administration of olaparib reduces NLRP3 protein expression in striatal neurons, and olaparib prevents the loss of parvalbuminergic and calretininergic neurons [67]. In this study, olaparib attenuated the oxLDL-mediated increase in NLRP3 inflammasome activity, and also inhibited subsequent adhesion of monocytes to endothelial cells and inhibited macrophage foam cell formation. Whether or not olaparib has a role in attenuation of NLRP3 inflammasome activity in *ApoE*<sup>-/-</sup> or *Ldlr*<sup>-/-</sup> mouse, pig or other atherosclerosis animal models warrants further investigation.

## Conclusion

The data presented here demonstrate that PARP inhibition inhibits dissociation of the I $\kappa$ B $\alpha$  subunit from RelA/p50 and RelB/p52 heterodimers in monocyte/macrophages. PARP inhibition also inhibits NLRP3 inflammasome activity induced by NF- $\kappa$ B and oxidative stress in monocytes/macrophages. These findings suggest that PARP inhibition combined with immunomodulators could have a therapeutic role in atherosclerosis.

## Supporting information

**S1 Fig. MCC950 compound abrogates oxLDL-induced increase in pro-IL-1 $\beta$  protein expression.** THP-1 cells were exposed to oxLDL, the NLRP3 inhibitor MCC950 (MCC) or their combination (MCC+OxL). Cell lysates were subjected to SDS-PAGE and immunoblotted with anti-pro-IL-1 $\beta$  (upper panel) or anti-vinculin antibody (bottom panel), as indicated. The band densities, relative to vinculin (loading control), were quantified using ImageJ (NIH, Bethesda, MD). Veh, vehicle. N = 3/group, \* P<0.05 vs Veh, one-way ANOVA, Newman-Keuls test.

(TIF)

**S2 Fig. Olaparib inhibits OxLDL-mediated increase in IL-1 $\beta$  and IL-18 secretion.** THP-1 cells were exposed to OxLDL, the PARP inhibitor olaparib (Olapa), or the NLRP3 inhibitor MCC950 (MCC). Secreted IL-1 $\beta$  (A) and IL-18 (B) in the cell culture medium were quantified by ELISA. N = 3/group, \* P<0.05 vs vehicle, #P<0.05 vs OxLDL only, one-way ANOVA, Newman-Keuls test.

(TIF)

**S3 Fig. Olaparib attenuates the co-immunoprecipitation of I $\kappa$ B $\alpha$  with RelB or p52.** Cell lysates were obtained from THP-1 monocytes exposed to reagents as indicated: Lane 1, vehicle; Lane 2, PARP inhibitor olaparib (5 mM, 24 hr); Lane 3, oxLDL (100mg/mL, 24 hr) or Lane 4, combination of oxLDL and olaparib. Protein complexes, co-immunoprecipitated with the indicated antibodies, were separated by SDS-PAGE and immunoblotted with the antibodies, as indicated. NR, normal rabbit IgG. Data shown are representative of three independent experiments. (A). Top panel was immunoblotted for RelB and bottom panel was immunoblotted for p52. Compared to vehicle (lane 1), OxLDL (lane 3), decreased co-immunoprecipitation of I $\kappa$ B $\alpha$  with both RelB and p52 while olaparib (lane 4) reversed the effect of oxLDL. Olaparib alone (lane 2) had no effect on dissociation of I $\kappa$ B $\alpha$  with RelB and p52. (B) Top panel was immunoblotted for I $\kappa$ B $\alpha$ . Bottom panel was immunoblotted for p52. Compared to vehicle lane (1), oxLDL alone (lane 3), decreased Co-IP of RelB with I $\kappa$ B $\alpha$  (top panel) but not with

p52 (bottom panel). Further olaparib reversed the effect of oxLDL on the co-IP of RelB with  $\text{I}\kappa\text{B}\alpha$  (lane 4, olaparib+oxLDL). Olaparib alone (lane 2) had no effect. (TIF)

## Acknowledgments

We are grateful for Jurgen Heymann (NIDDK, NIH, Bethesda, MD) for critical review of the manuscript.

## Author Contributions

**Conceptualization:** Hewang Lee, Peng Qu.

**Data curation:** Khamis Mustafa, Dan He, Ying Wang.

**Formal analysis:** Khamis Mustafa, Ying Han, Dan He, Nan Niu, Pedro A. Jose, Yinong Jiang, Jeffrey B. Kopp, Hewang Lee.

**Funding acquisition:** Hewang Lee, Peng Qu.

**Investigation:** Khamis Mustafa, Dan He, Ying Wang, Hewang Lee, Peng Qu.

**Methodology:** Khamis Mustafa, Ying Han, Dan He, Ying Wang, Hewang Lee.

**Project administration:** Hewang Lee, Peng Qu.

**Resources:** Peng Qu.

**Supervision:** Hewang Lee, Peng Qu.

**Validation:** Khamis Mustafa, Dan He, Ying Wang, Jeffrey B. Kopp, Hewang Lee, Peng Qu.

**Visualization:** Ying Han, Dan He, Nan Niu, Pedro A. Jose, Yinong Jiang, Hewang Lee.

**Writing – original draft:** Hewang Lee.

**Writing – review & editing:** Pedro A. Jose, Jeffrey B. Kopp, Hewang Lee.

## References

1. Pandey N, Black BE. Rapid detection and signaling of DNA damage by PARP-1. *Trends Biochem Sci.* 2021; 46:744–757. <https://doi.org/10.1016/j.tibs.2021.01.014> PMID: 33674152
2. Zong C, Zhu T, He J, Huang R, Jia R, Shen J. PARP mediated DNA damage response, genomic stability and immune responses. *Int J Cancer.* 2022; 150: 1745–1759. <https://doi.org/10.1002/ijc.33918> PMID: 34952967
3. Pazzaglia S, Pioli C. Multifaceted role of PARP-1 in DNA repair and inflammation: pathological and therapeutic implications in cancer and non-cancer diseases. *Cells.* 2019; 9: 41. <https://doi.org/10.3390/cells9010041> PMID: 31877876
4. Fehr AR, Singh SA, Kerr CM, Mukai S, Higashi H, Aikawa M. The impact of PARPs and ADP-ribosylation on inflammation and host-pathogen interactions. *Genes Dev.* 2020; 34: 341–359. <https://doi.org/10.1101/gad.334425.119> PMID: 32029454
5. Libby P. Inflammation in atherosclerosis—no longer a theory. *Clin Chem.* 2021; 67: 131–142. <https://doi.org/10.1093/clinchem/hvaa275> PMID: 33393629
6. Munro JM, Cotran RS. The pathogenesis of atherosclerosis: atherogenesis and inflammation. *Lab Invest.* 1988; 58: 249–261. PMID: 3279259
7. Di Pietro N, Formoso G, Pandolfi A. Physiology and pathophysiology of oxLDL uptake by vascular wall cells in atherosclerosis. *Vascul Pharmacol.* 2016; 84: 1–7. <https://doi.org/10.1016/j.vph.2016.05.013> PMID: 27256928
8. Hoseini Z, Sepahvand F, Rashidi B, Sahebkar A, Masoudifar A, Mirzaei H. NLRP3 inflammasome: its regulation and involvement in atherosclerosis. *J Cell Physiol.* 2018; 233: 2116–2132. <https://doi.org/10.1002/jcp.25930> PMID: 28345767

9. Abderrazak A, Syrovets T, Couchie D, El Hadri K, Friguet B, Simmet T, et al. NLRP3 inflammasome: from a danger signal sensor to a regulatory node of oxidative stress and inflammatory diseases. *Redox Biol.* 2015; 4: 296–307. <https://doi.org/10.1016/j.redox.2015.01.008> PMID: 25625584
10. Duewell P, Kono H, Rayner KJ, Sirois CM, Vladimer G, Bauernfeind FG, et al. NLRP3 inflammasomes are required for atherogenesis and activated by cholesterol crystals. *Nature.* 2010; 464: 1357–1361. <https://doi.org/10.1038/nature08938> PMID: 20428172
11. Schroder K, Tschopp J. The inflammasomes. *Cell.* 2010; 140: 821–32. <https://doi.org/10.1016/j.cell.2010.01.040> PMID: 20303873
12. Seoane PI, Lee B, Hoyle C, Yu S, Lopez-Castejon G, Lowe M, et al. The NLRP3-inflammasome as a sensor of organelle dysfunction. *J Cell Biol.* 2020; 219: e202006194. <https://doi.org/10.1083/jcb.202006194> PMID: 33044555
13. Liu D, Zhong Z, Karin M. NF- $\kappa$ B: A double-edged sword controlling inflammation. *Biomedicines.* 2022; 10: 1250. <https://doi.org/10.3390/biomedicines10061250> PMID: 35740272
14. O’Dea E, Hoffmann A. NF- $\kappa$ B signaling. *Wiley Interdiscip Rev Syst Biol Med.* 2009; 1: 107–115. <https://doi.org/10.1002/wsbm.30> PMID: 20151024
15. Broz P, Dixit VM. Inflammasomes: mechanism of assembly, regulation and signalling. *Nat Rev Immunol.* 2016; 16: 407–420. <https://doi.org/10.1038/nri.2016.58> PMID: 27291964
16. Bochum S, Berger S, Martens UM. Olaparib. *Recent Results Cancer Res.* 2018; 211: 217–233. [https://doi.org/10.1007/978-3-319-91442-8\\_15](https://doi.org/10.1007/978-3-319-91442-8_15) PMID: 30069770
17. Lee H, Roshanravan H, Wang Y, Okamoto K, Ryu J, Shrivastav S, et al. ApoL1 renal risk variants induce aberrant THP-1 monocyte differentiation and increase eicosanoid production via enhanced expression of cyclooxygenase-2. *Am J Physiol Renal Physiol.* 2018; 315: F140–F150. <https://doi.org/10.1152/ajprenal.00254.2017> PMID: 29357411
18. Wang J, Ji Y, Ai C, Chen JR, Gan D, Zhang J, et al. Optimized allotopic expression of mitochondrial ND6 transgene restored complex I and apoptosis deficiencies caused by LHON-linked ND6 14484T > C mutation. *J Biomed Sci.* 2023; 30: 63. <https://doi.org/10.1186/s12929-023-00951-1> PMID: 37537557
19. Li H, Adamik R, Pacheco-Rodriguez G, Moss J, Vaughan M. Protein kinase A-anchoring (AKAP) domains in brefeldin A-inhibited guanine nucleotide-exchange protein 2 (BIG2). *Proc Natl Acad Sci USA.* 2003; 100: 1627–32. <https://doi.org/10.1073/pnas.0337678100> PMID: 12571360
20. Li WL, Hua LG, Qu P, Yan WH, Ming C, Jun YD, et al. NLRP3 inflammasome: a novel link between lipoproteins and atherosclerosis. *Arch Med Sci.* 2016; 12: 950–958. <https://doi.org/10.5114/aoms.2016.61356> PMID: 27695484
21. Fang Y, Zhu Y, Wu Y, Liu L, Wang H. Protective effects of mitochondrial fission inhibition on ox-LDL induced VSMC foaming via metabolic reprogramming. *Front Pharmacol.* 2022; 13: 970151. <https://doi.org/10.3389/fphar.2022.970151> PMID: 36120304
22. Shao BZ, Xu ZQ, Han BZ, Su DF, Liu C. NLRP3 inflammasome and its inhibitors: a review. *Front Pharmacol.* 2015; 6: 262. <https://doi.org/10.3389/fphar.2015.00262> PMID: 26594174
23. Abeti R, Duchon MR. Activation of PARP by oxidative stress induced by  $\beta$ -amyloid: implications for Alzheimer’s disease. *Neurochem Res.* 2012; 37: 2589–2596. <https://doi.org/10.1007/s11064-012-0895-x> PMID: 23076628
24. Tarragó MG, Chini CCS, Kanamori KS, Warner GM, Caride A, de Oliveira GC, et al. A potent and specific CD38 inhibitor ameliorates age-related metabolic dysfunction by reversing tissue NAD<sup>+</sup> decline. *Cell Metab.* 2018; 27: 1081–1095.e10. <https://doi.org/10.1016/j.cmet.2018.03.016> PMID: 29719225
25. Yu JW, Lee MS. Mitochondria and the NLRP3 inflammasome: physiological and pathological relevance. *Arch Pharm Res.* 2016; 39: 1503–1518. <https://doi.org/10.1007/s12272-016-0827-4> PMID: 27600432
26. Fu J, Wu H. Structural mechanisms of NLRP3 inflammasome assembly and activation. *Annu Rev Immunol.* 2023; 41: 301–316. <https://doi.org/10.1146/annurev-immunol-081022-021207> PMID: 36750315
27. Poston RN, Chughtai J, Ujkaj D, Louis H, Leake DS, Cooper D. Monocytic cell adhesion to oxidised ligands: relevance to cardiovascular disease. *Biomedicines.* 2022; 10: 3083. <https://doi.org/10.3390/biomedicines10123083> PMID: 36551839
28. Corrêa R, Silva LFF, Ribeiro DJS, Almeida RDN, Santos IO, et al. Lysophosphatidylcholine induces NLRP3 inflammasome-mediated foam cell formation and pyroptosis in human monocytes and endothelial cells. *Front Immunol.* 2020; 10: 2927. <https://doi.org/10.3389/fimmu.2019.02927> PMID: 31998284
29. Andrade-Oliveira V, Foresto-Neto O, Watanabe IKM, Zatz R, Câmara NOS. Inflammation in renal diseases: new and old players. *Front Pharmacol.* 2019; 10: 1192. <https://doi.org/10.3389/fphar.2019.01192> PMID: 31649546
30. Wibisana JN, Okada M. Encoding and decoding NF- $\kappa$ B nuclear dynamics. *Curr Opin Cell Biol.* 2022; 77: 102103. <https://doi.org/10.1016/j.ceb.2022.102103> PMID: 35636375

31. Sun SC. The non-canonical NF- $\kappa$ B pathway in immunity and inflammation. *Nat Rev Immunol.* 2017; 17: 545–558. <https://doi.org/10.1038/nri.2017.52> PMID: 28580957
32. Zhong L, Simard MJ, Huot J. Endothelial microRNAs regulating the NF- $\kappa$ B pathway and cell adhesion molecules during inflammation. *FASEB J.* 2018; 32: 4070–4084. <https://doi.org/10.1096/fj.201701536R> PMID: 29565737
33. Israël A. The IKK complex, a central regulator of NF- $\kappa$ B activation. *Cold Spring Harb Perspect Biol.* 2010; 2: a000158. <https://doi.org/10.1101/cshperspect.a000158> PMID: 20300203
34. Wang B, Shen J. NF- $\kappa$ B Inducing Kinase Regulates Intestinal Immunity and Homeostasis. *Front Immunol.* 2022; 13: 895636. <https://doi.org/10.3389/fimmu.2022.895636> PMID: 35833111
35. Kuznetsova T, Prange KHM, Glass CK, de Winther MPJ. Transcriptional and epigenetic regulation of macrophages in atherosclerosis. *Nat Rev Cardiol.* 2020; 17: 216–228. <https://doi.org/10.1038/s41569-019-0265-3> PMID: 31578516
36. Barrett TJ. Macrophages in atherosclerosis regression. *Arterioscler Thromb Vasc Biol.* 2020; 40: 20–33. <https://doi.org/10.1161/ATVBAHA.119.312802> PMID: 31722535
37. Ertuglu LA, Mutchler AP, Yu J, Kirabo A. Inflammation and oxidative stress in salt sensitive hypertension; The role of the NLRP3 inflammasome. *Front Physiol.* 2022; 13: 1096296. <https://doi.org/10.3389/fphys.2022.1096296> PMID: 36620210
38. Chiu LY, Huang DY, Lin WW. PARP-1 regulates inflammasome activity by poly-ADP-ribosylation of NLRP3 and interaction with TXNIP in primary macrophages. *Cell Mol Life Sci.* 2022; 79: 108. <https://doi.org/10.1007/s00018-022-04138-z> PMID: 35098371
39. Lee H, Jose PA. Coordinated contribution of NADPH oxidase- and mitochondria-derived reactive oxygen species in metabolic syndrome and its implication in renal dysfunction. *Front Pharmacol.* 2021; 12: 670076. <https://doi.org/10.3389/fphar.2021.670076> PMID: 34017260
40. van Bruggen R, Köker MY, Jansen M, van Houdt M, Roos D, Kuijpers TW, et al. Human NLRP3 inflammasome activation is Nox1-4 independent. *Blood.* 2010; 115: 5398–5400. <https://doi.org/10.1182/blood-2009-10-250803> PMID: 20407038
41. Leu SY, Tsang YL, Ho LC, Yang CC, Shao AN, Chang CY, et al. NLRP3 inflammasome activation, metabolic danger signals, and protein binding partners. *J Endocrinol.* 2023; 257: e220184. <https://doi.org/10.1530/JOE-22-0184> PMID: 36799299
42. Gross CJ, Mishra R, Schneider KS, Médard G, Wettmarshausen J, Dittlein DC, et al. K<sup>+</sup> efflux-independent NLRP3 inflammasome activation by small molecules targeting mitochondria. *Immunity.* 2016; 45: 761–773. <https://doi.org/10.1016/j.immuni.2016.08.010> PMID: 27692612
43. Dominic A, Le NT, Takahashi M. Loop between NLRP3 inflammasome and reactive oxygen species. *Antioxid Redox Signal.* 2022; 36: 784–796. <https://doi.org/10.1089/ars.2020.8257> PMID: 34538111
44. Murphy MP, Bayir H, Belousov V, Chang CJ, Davies KJA, Davies MJ, et al. Guidelines for measuring reactive oxygen species and oxidative damage in cells and in vivo. *Nat Metab.* 2022 Jun; 4(6):651–662. <https://doi.org/10.1038/s42255-022-00591-z> PMID: 35760871
45. Xiao Y, Meierhofer D. Are Hydroethidine-Based Probes Reliable for Reactive Oxygen Species Detection? *Antioxid Redox Signal.* 2019 Aug 1; 31(4):359–367. <https://doi.org/10.1089/ars.2018.7535> PMID: 29790367
46. Yabal M, Calleja DJ, Simpson DS, Lawlor KE. Stressing out the mitochondria: Mechanistic insights into NLRP3 inflammasome activation. *J Leukoc Biol.* 2019; 105: 377–399. <https://doi.org/10.1002/JLB.MR0318-124R> PMID: 30589456
47. Sutcu HH, Matta E, Ishchenko AA. Role of PARP-catalyzed ADP-ribosylation in the crosstalk between DNA strand breaks and epigenetic regulation. *J Mol Biol.* 2020; 432: 1769–1791. <https://doi.org/10.1016/j.jmb.2019.12.019> PMID: 31866292
48. Azarm K, Smith S. Nuclear PARPs and genome integrity. *Genes Dev.* 2020; 34: 285–301. <https://doi.org/10.1101/gad.334730.119> PMID: 32029453
49. Mashimo M, Kato J, Moss J. Structure and function of the ARH family of ADP-ribosyl-acceptor hydrolases. *DNA Repair.* 2014; 23: 88–94. <https://doi.org/10.1016/j.dnarep.2014.03.005> PMID: 24746921
50. Kunze FA, Hottiger MO. Regulating immunity via ADP-ribosylation: therapeutic implications and beyond. *Trends Immunol.* 2019; 40: 159–173. <https://doi.org/10.1016/j.it.2018.12.006> PMID: 30658897
51. Martínez-Morcillo FJ, Cantón-Sandoval J, Martínez-Menchón T, Corbalán-Vélez R, Mesa-Del-Castillo P, Pérez-Oliva AB, et al. Non-canonical roles of NAMPT and PARP in inflammation. *Dev Comp Immunol.* 2021; 115: 103881. <https://doi.org/10.1016/j.dci.2020.103881> PMID: 33038343
52. Henning RJ, Bourgeois M, Harbison RD. Poly(ADP-ribose) polymerase (PARP) and PARP inhibitors: mechanisms of action and role in cardiovascular disorders. *Cardiovasc Toxicol.* 2018; 18: 493–506. <https://doi.org/10.1007/s12012-018-9462-2> PMID: 29968072

53. Hassa PO, Hottiger MO. The functional role of poly(ADP-ribose)polymerase 1 as novel coactivator of NF- $\kappa$ B in inflammatory disorders. *Cell Mol Life Sci.* 2002; 59: 1534–1553. <https://doi.org/10.1007/s00018-002-8527-2> PMID: 12440774
54. Páhi ZG, Borsos BN, Pantazi V, Ujfaludi Z, Pankotai T. PARylation during transcription: insights into the fine-tuning mechanism and regulation. *Cancers.* 2020; 12: 183. <https://doi.org/10.3390/cancers12010183> PMID: 31940791
55. Gupte R, Nandu T, Kraus WL. Nuclear ADP-ribosylation drives IFN $\gamma$ -dependent STAT1 $\alpha$  enhancer formation in macrophages. *Nat Commun.* 2021; 12: 3931. <https://doi.org/10.1038/s41467-021-24225-2> PMID: 34168143
56. Martinez-Zamudio R., Ha HC. Histone ADP-ribosylation facilitates gene transcription by directly remodeling nucleosomes. *Mol Cell Biol.* 2012; 32:2490–2502. <https://doi.org/10.1128/MCB.06667-11> PMID: 22547677
57. Hassa PO, Covic M, Hasan S, Imhof R, Hottiger MO. The enzymatic and DNA binding activity of PARP-1 are not required for NF- $\kappa$ B coactivator function. *J Biol Chem.* 2001; 276: 45588–45597. <https://doi.org/10.1074/jbc.M106528200> PMID: 11590148
58. Xu F, Sun Y, Yang SZ, Zhou T, Jhala N, McDonald J, et al. Cytoplasmic PARP-1 promotes pancreatic cancer tumorigenesis and resistance. *Int J Cancer.* 2019; 145: 474–483. <https://doi.org/10.1002/ijc.32108> PMID: 30614530
59. Hottiger MO, Hassa PO, Lüscher B, Schüler H, Koch-Nolte F. Toward a unified nomenclature for mammalian ADP-ribosyltransferases. *Trends Biochem Sci.* 2010; 35: 208–219. <https://doi.org/10.1016/j.tibs.2009.12.003> PMID: 20106667
60. Dawicki-McKenna JM, Langelier MF, DeNizio JE, Riccio AA, Cao CD, Karch KR, et al. PARP-1 activation requires local unfolding of an autoinhibitory domain. *Mol Cell.* 2015; 60: 755–768. <https://doi.org/10.1016/j.molcel.2015.10.013> PMID: 26626480
61. Verheugd P, Forst AH, Milke L, Herzog N, Feijs KL, Kremmer E, et al. Regulation of NF- $\kappa$ B signalling by the mono-ADP-ribosyltransferase ARTD10. *Nat Commun.* 2013; 4: 1683. <https://doi.org/10.1038/ncomms2672> PMID: 23575687
62. Welsby I, Hutin D, Gueydan C, Kruys V, Rongvaux A, Leo O. PARP12, an interferon-stimulated gene involved in the control of protein translation and inflammation. *J Biol Chem.* 2014; 289: 26642–26657. <https://doi.org/10.1074/jbc.M114.589515> PMID: 25086041
63. Lee H, Fessler MB, Qu P, Heymann J, Kopp JB. Macrophage polarization in innate immune responses contributing to pathogenesis of chronic kidney disease. *BMC Nephrol.* 2020; 21: 270. <https://doi.org/10.1186/s12882-020-01921-7> PMID: 32660446
64. Viola J, Soehnlein O. Atherosclerosis—a matter of unresolved inflammation. *Semin Immunol.* 2015; 27: 184–193. <https://doi.org/10.1016/j.smim.2015.03.013> PMID: 25865626
65. Ahmad A, Vieira JC, de Mello AH, de Lima TM, Ariga SK, Barbeiro DF, et al. The PARP inhibitor olaparib exerts beneficial effects in mice subjected to cecal ligation and puncture and in cells subjected to oxidative stress without impairing DNA integrity: A potential opportunity for repurposing a clinically used oncological drug for the experimental therapy of sepsis. *Pharmacol Res.* 2019; 145: 104263. <https://doi.org/10.1016/j.phrs.2019.104263> PMID: 31071432
66. Sethi GS, Sharma S, Naura AS. PARP inhibition by olaparib alleviates chronic asthma-associated remodeling features via modulating inflammasome signaling in mice. *IUBMB Life.* 2019; 71: 1003–1013. <https://doi.org/10.1002/iub.2048> PMID: 30964965
67. Paldino E, D'Angelo V, Laurenti D, Angeloni C, Sancesario G, Fusco FR. Modulation of inflammasome and pyroptosis by olaparib, a PARP-1 inhibitor, in the R6/2 mouse model of Huntington's disease. *Cells.* 2020; 9: 2286. <https://doi.org/10.3390/cells9102286> PMID: 33066292
